# Supplementary material for: Interventions Using Wearable Physical Activity Trackers Among Adults With Cardiometabolic Conditions: A Systematic Review and Meta-analysis
Source: PubMed Central journal article supplement (PMC9387744; doi:10.1001/jamanetworkopen.2021.16382), 2021-07-20
Supplement: jamanetwopen-e2116382-s001.pdf [file jamanetwopen-e2116382-s001.pdf]

## Supplementary Online Content

Hodkinson A, Kontopantelis E, Adeniji C, et al. Interventions using wearable physical activity trackers among adults with cardiometabolic conditions: a systematic review and meta-analysis. *JAMA Netw Open*. 2021;4(7):e2116382.  
doi:10.1001/jamanetworkopen.2021.16382

**eFigure 1.** Forest Plot of Accelerometer/Fitbit vs Pedometer-Based Interventions With Prediction Interval

**eFigure 2.** Forest Plot of Pedometer-Based Interventions on Mean Difference Scale

**eFigure 3.** Cumulative Forest Plot of PA Performance Based on Total PA Engagement Time (Combined by Total Minutes)

**eFigure 4.** Individual Funnel Plots of Accelerometer/Fitbit and Pedometer-Based Interventions

**eFigure 5.** All Forest Plots

**eTable 1.** Search Strategies

**eTable 2.** Citations of Eligible Studies for Review

**eTable 3.** Summary of Intervention Characteristics by Study

**eTable 4.** Risk of Bias Study-by-Study Summary and Overall, by Each Domain

This supplementary material has been provided by the authors to give readers additional information about their work.

eFigure 1: Forest plot of Accelerometer/Fitbit vs pedometer-based interventions with prediction interval

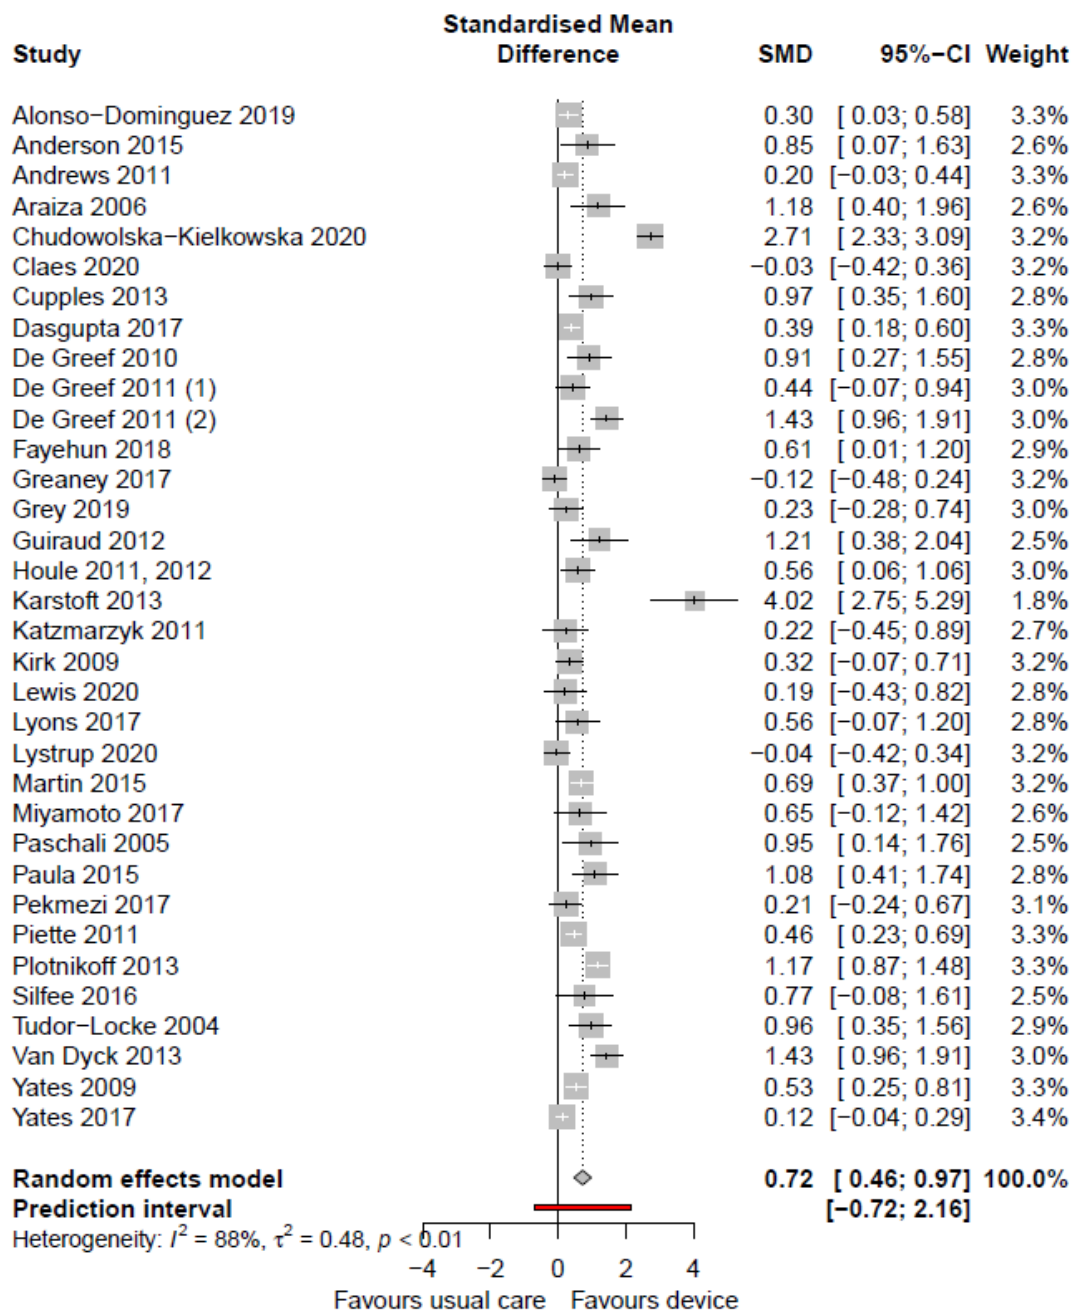

eFigure 2: Forest plot of pedometer-based interventions on mean difference scale

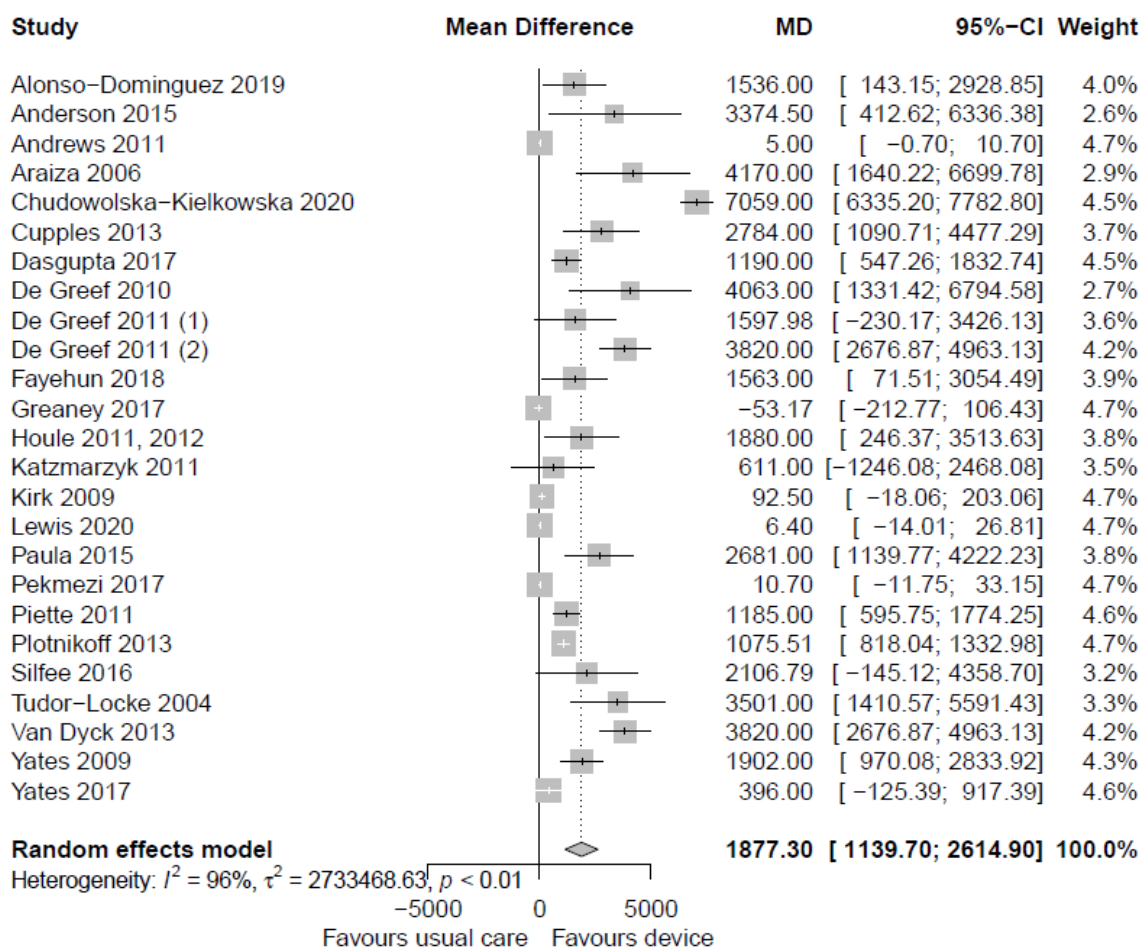

eFigure 3: Cumulative forest plot ordered by highest-to-lowest total session time engagement in PA (recorded by total minutes)

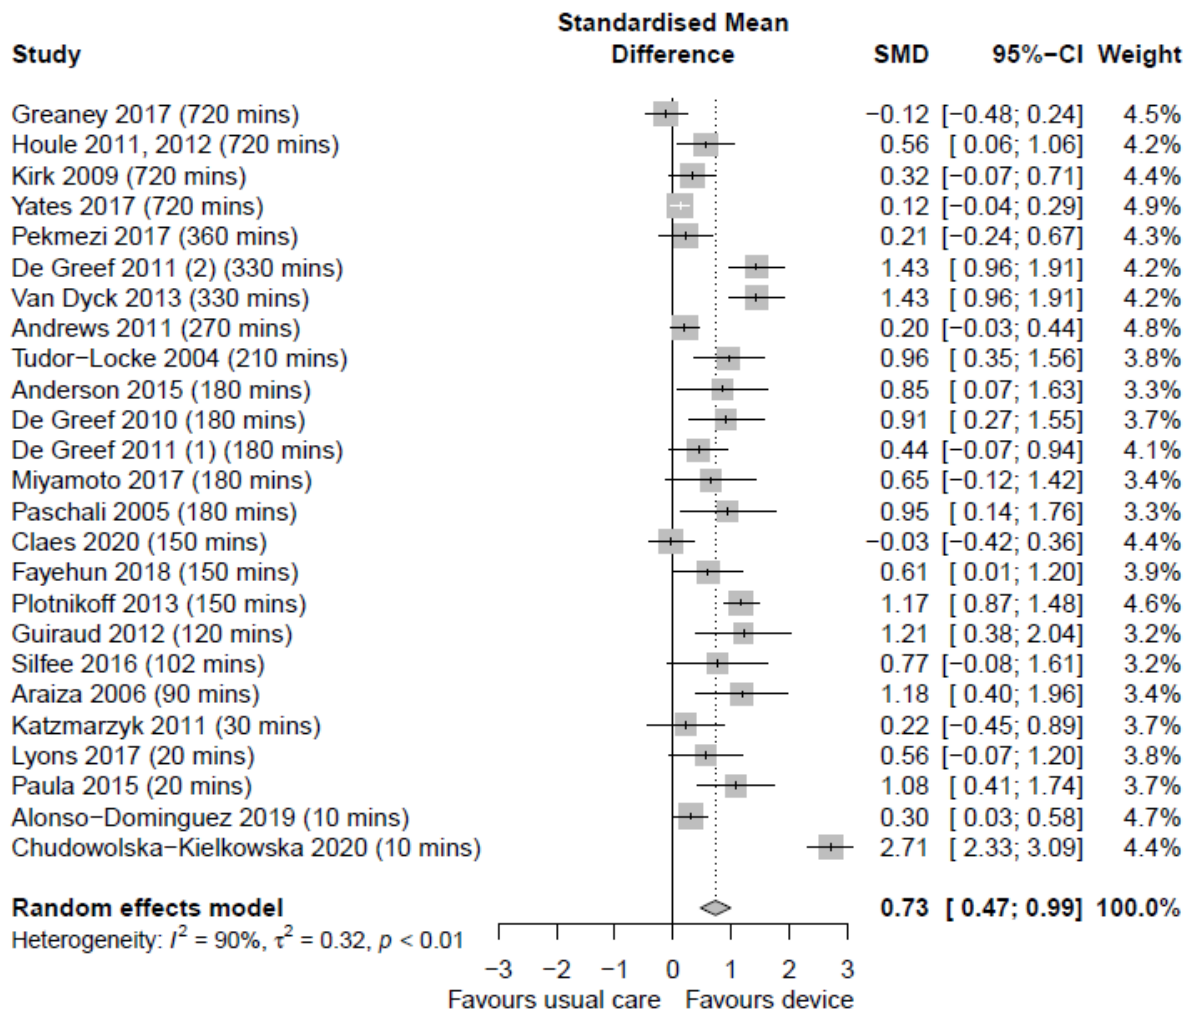

eFigure 4: Individual funnel plots of accelerometer/Fitbit and pedometer-based interventions

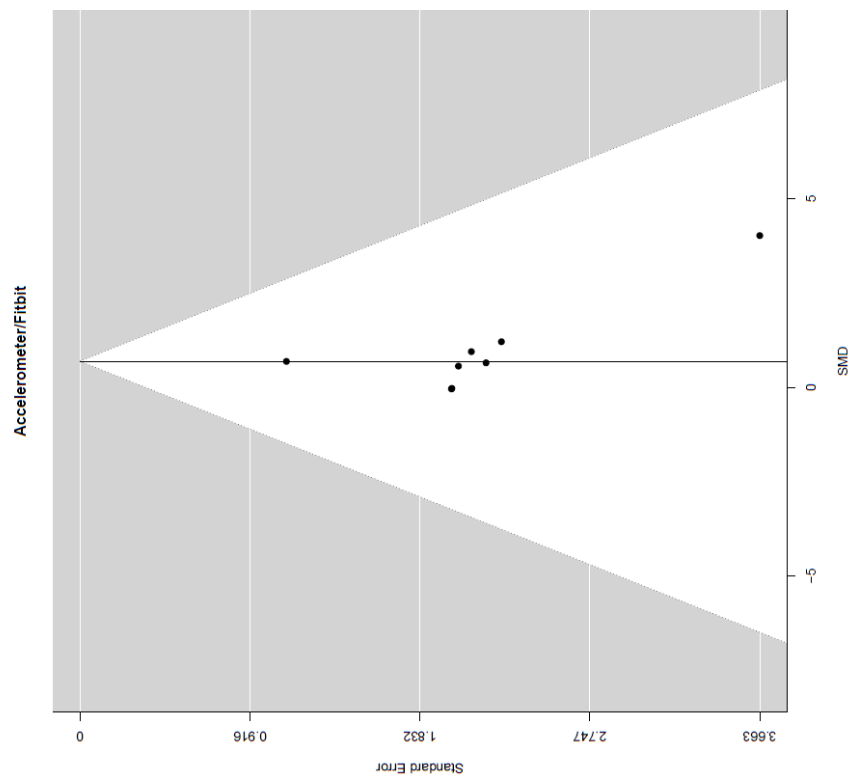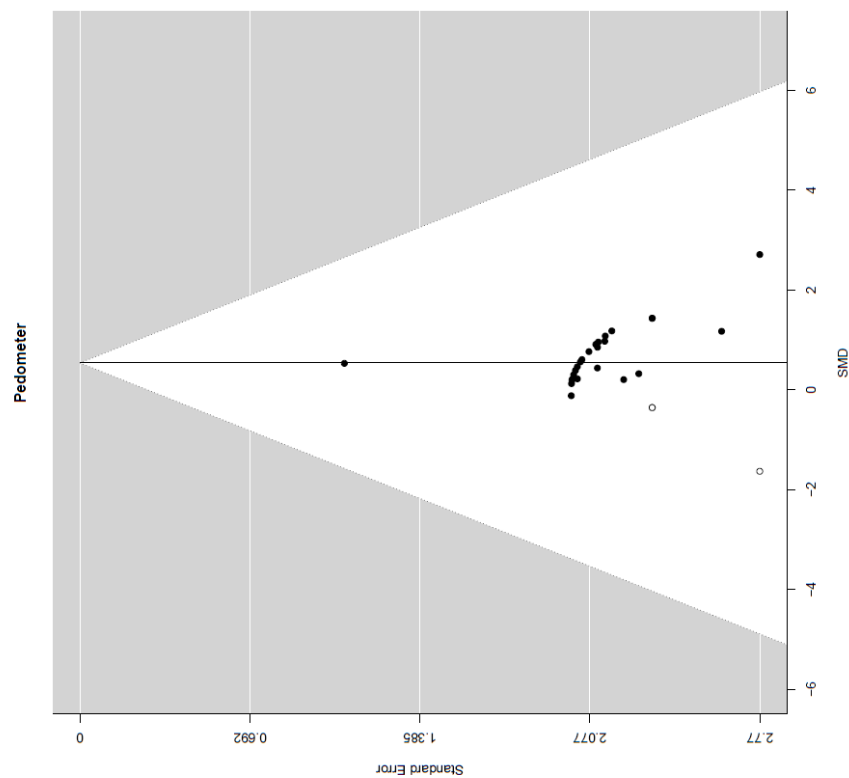

## Meta regression results (egger's and trim & fill)

### Pedometers:

Random/mixed effects version of the Egger test:

Regression Test for Funnel Plot Asymmetry

model: mixed-effects meta-regression model

predictor: standard error

test for funnel plot asymmetry:  $z = 0.9660$ ,  $p = 0.3340$

Trim and fill:

Estimated number of missing studies on the left side: 0 (SE = 2.9654)

Random-Effects Model (k = 24; tau<sup>2</sup> estimator: REML)

tau<sup>2</sup> (estimated amount of total heterogeneity): 0 (SE = 1.3174)

tau (square root of estimated tau<sup>2</sup> value): 0

I<sup>2</sup> (total heterogeneity / total variability): 0.00%

H<sup>2</sup> (total variability / sampling variability): 1.00

Test for Heterogeneity:

Q(df = 23) = 1.4798, p-val = 1.0000

Model Results:

| estimate | se     | zval   | pval          | ci.lb   | ci.ub  |
|----------|--------|--------|---------------|---------|--------|
| 0.6179   | 0.4335 | 1.4254 | <b>0.1541</b> | -0.2318 | 1.4675 |

---

Signif. codes: 0 '\*\*\*' 0.001 '\*\*' 0.01 '\*' 0.05 '.' 0.1 ' ' 1

### Accelerometers/Fitbits:

Random/mixed effects version of the Egger test:

Regression Test for Funnel Plot Asymmetry

model: mixed-effects meta-regression model

predictor: standard error

test for funnel plot asymmetry:  $z = 0.4884$ ,  $p = 0.6253$

Trim and fill:

Estimated number of missing studies on the left side: 0 (SE = 1.9044)

Random-Effects Model (k = 8; tau<sup>2</sup> estimator: REML)

tau<sup>2</sup> (estimated amount of total heterogeneity): 0 (SE = 1.7815)

tau (square root of estimated tau<sup>2</sup> value): 0

I<sup>2</sup> (total heterogeneity / total variability): 0.00%

H<sup>2</sup> (total variability / sampling variability): 1.00

Test for Heterogeneity:

Q(df = 7) = 1.2054, p-val = 0.9908

Model Results:

| estimate | se     | zval   | pval          | ci.lb   | ci.ub  |
|----------|--------|--------|---------------|---------|--------|
| 0.6552   | 0.6655 | 0.9845 | <b>0.3249</b> | -0.6492 | 1.9596 |

---  
Signif. codes: 0 '\*\*\*' 0.001 '\*\*' 0.01 '\*' 0.05 '.' 0.1 ' ' 1

eFigure 5: All forest plots

Physical activity measurement used for primary outcome (Steps vs. MVPA)

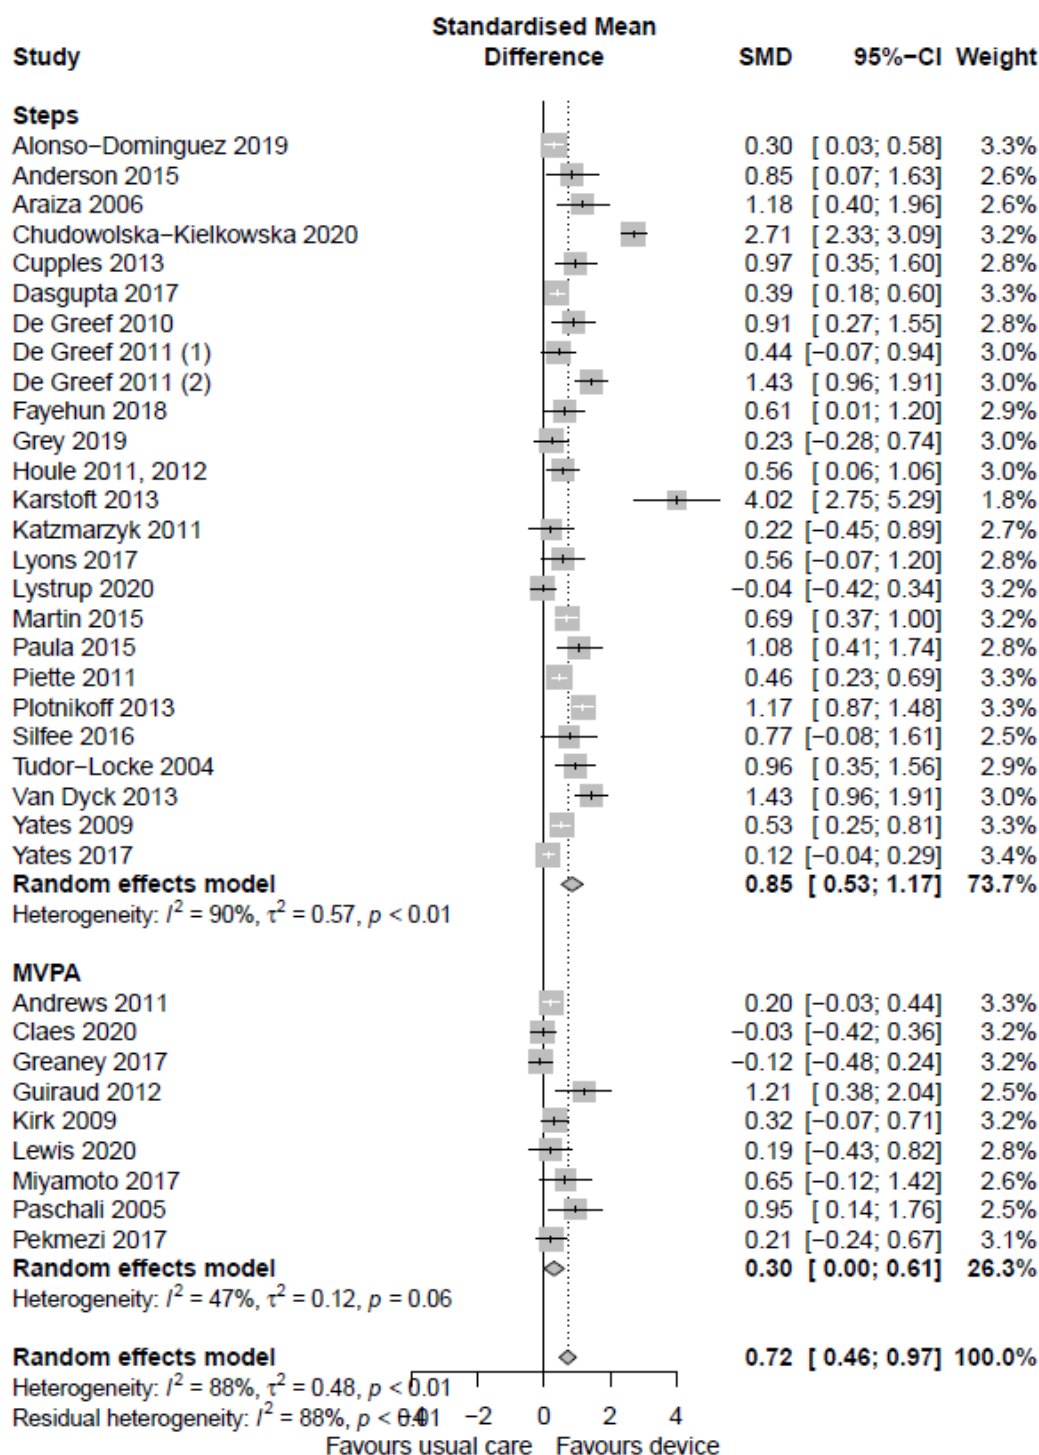



Physical activity by delivery type (FTF consultation vs. self-managed)

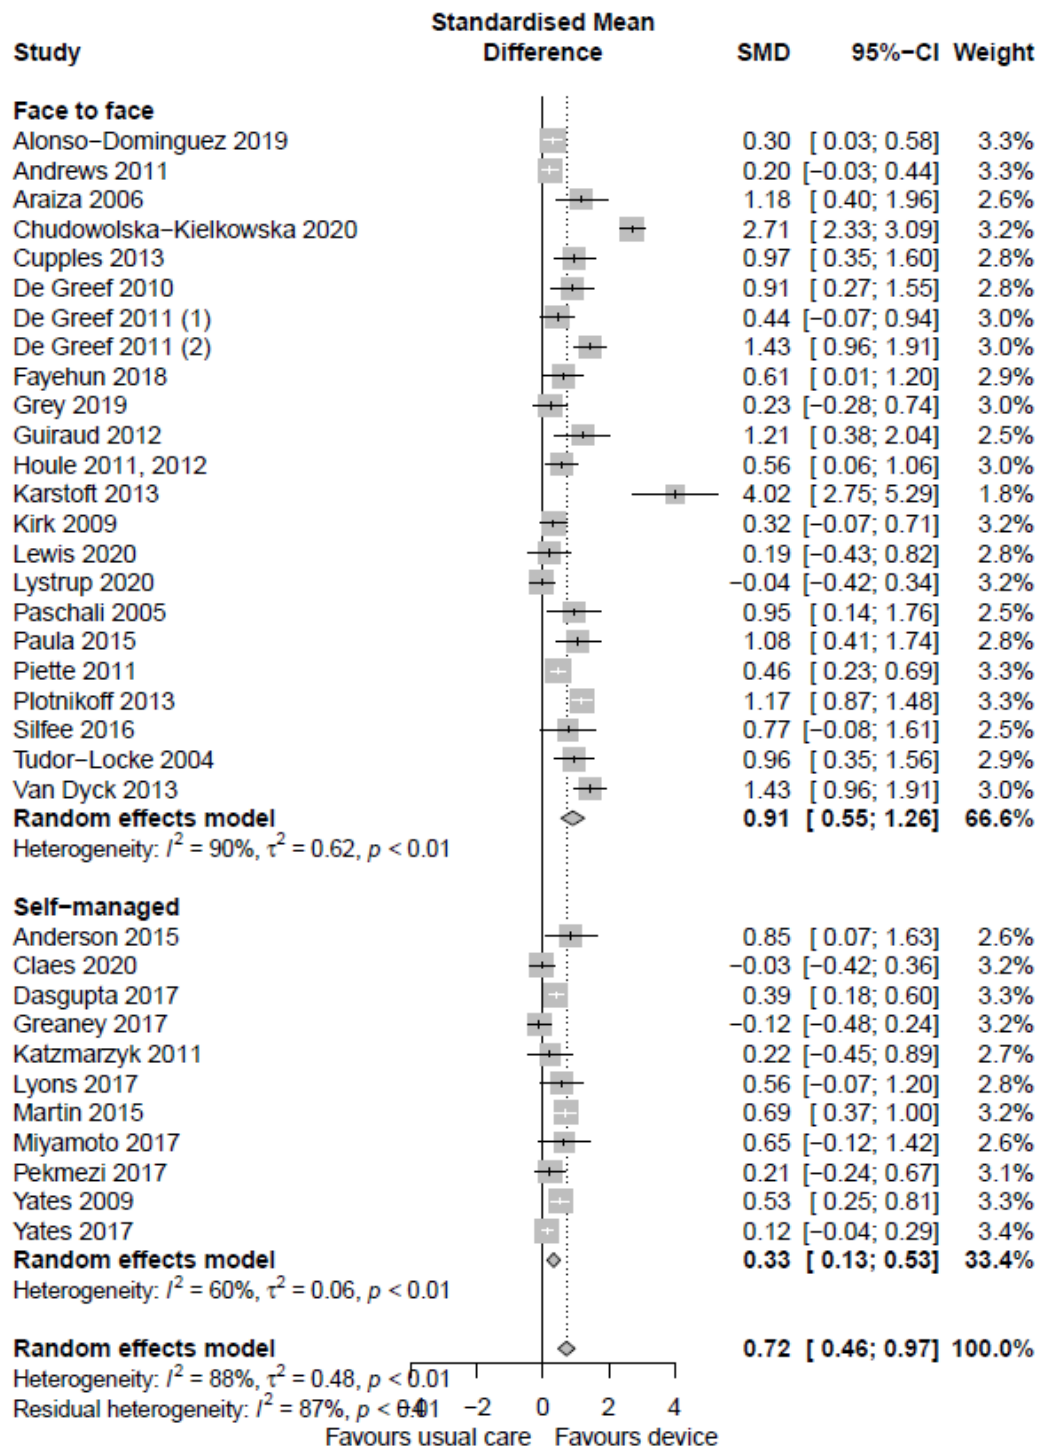

Blood (sugar) glucose (hba1c %)

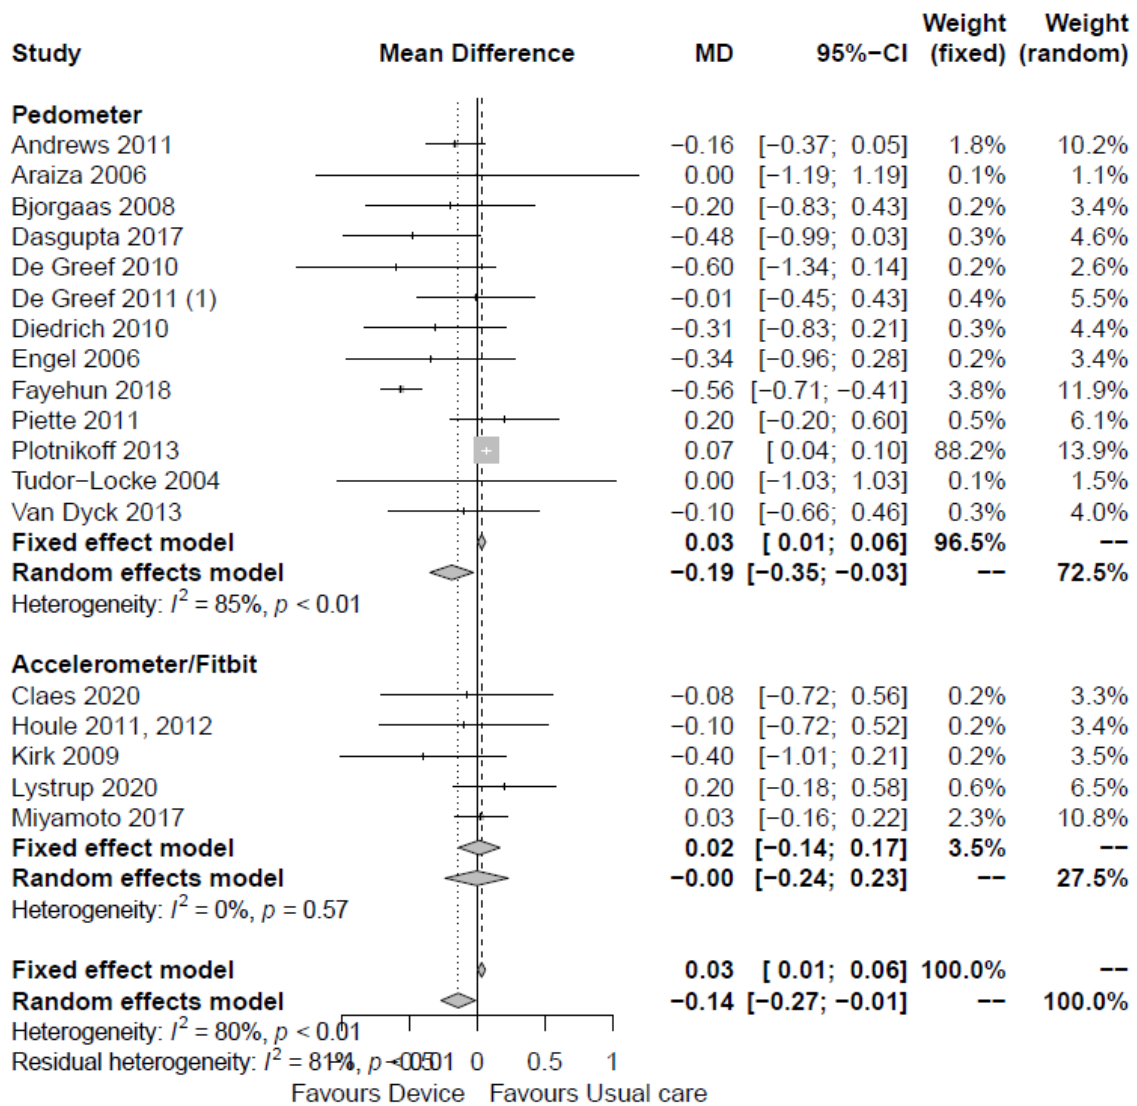

Blood pressure (SBP and DBP)

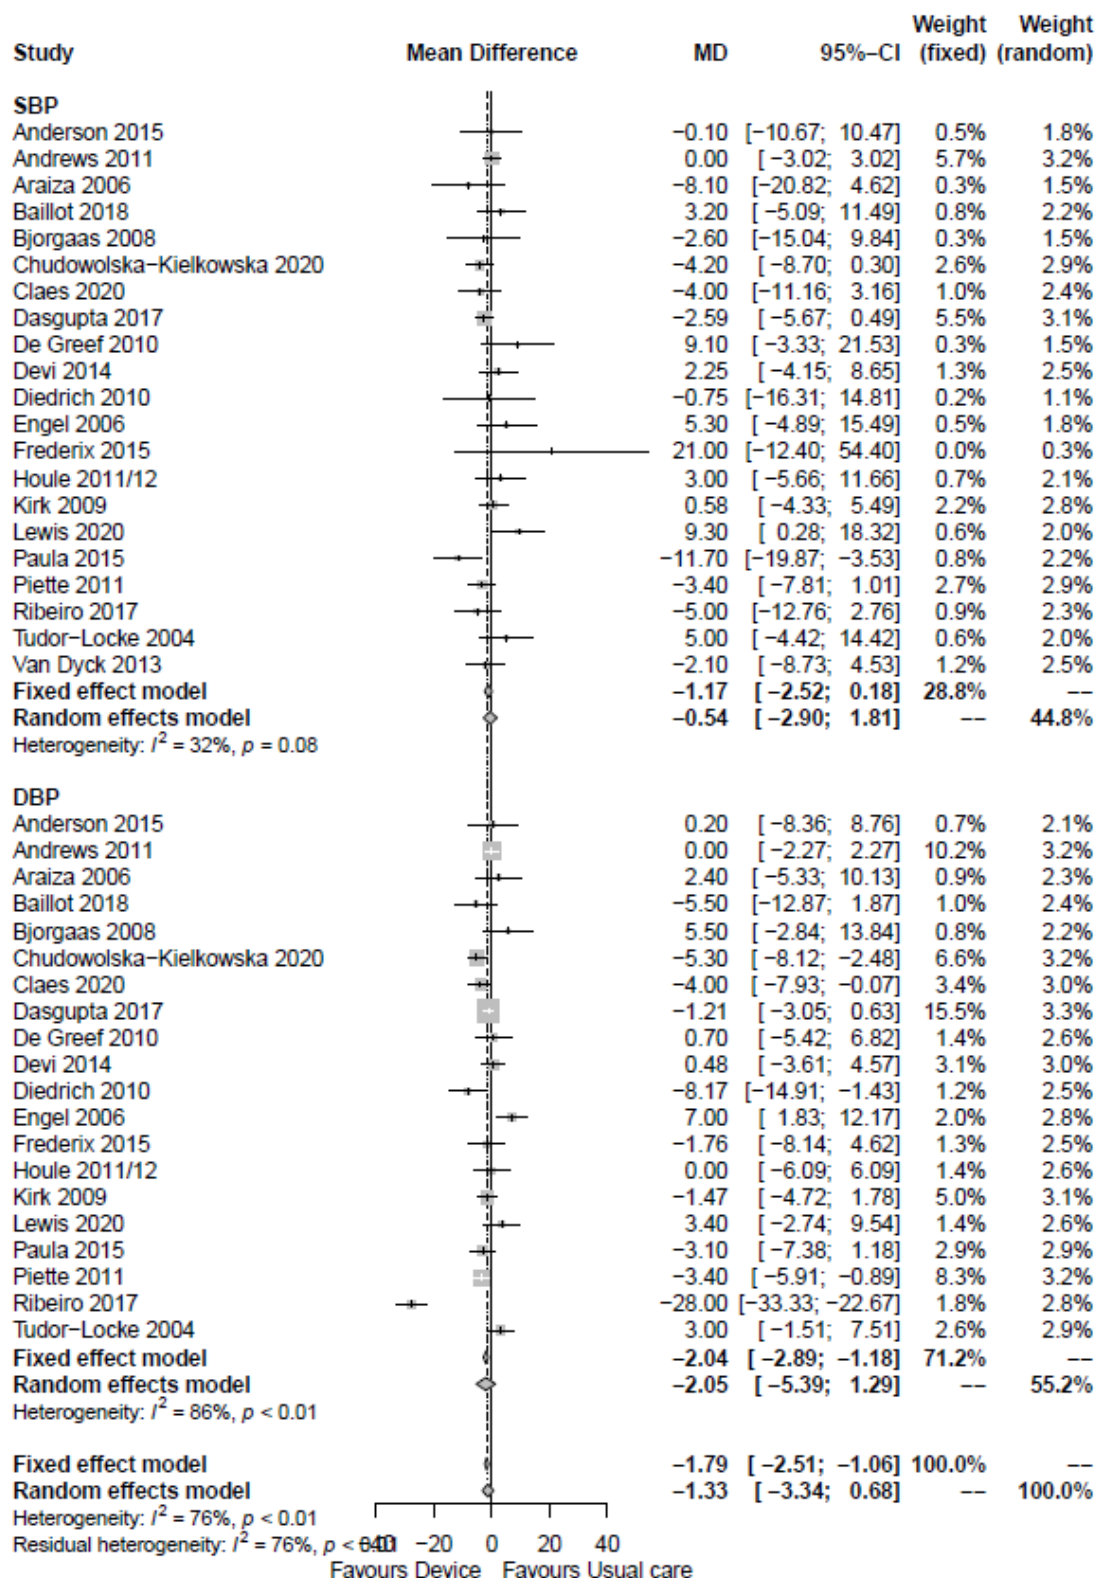

Cholesterol (total, HDL, LDL)

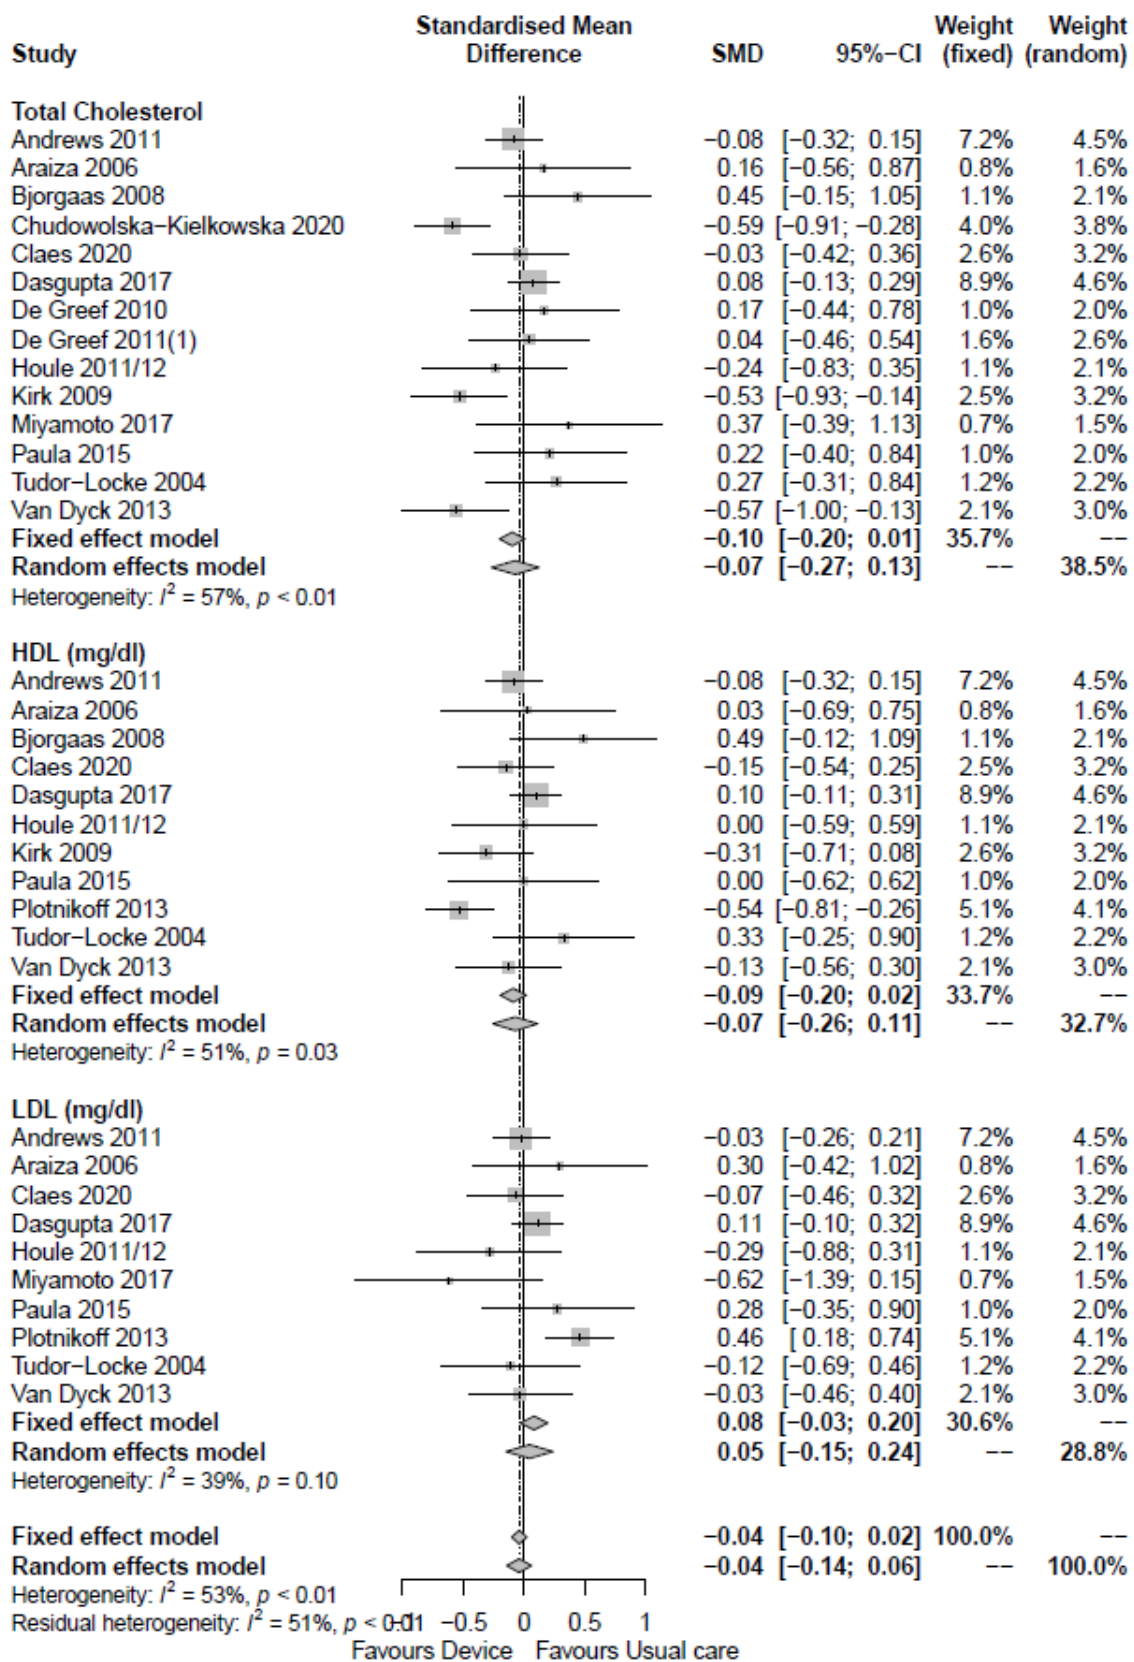

BMI

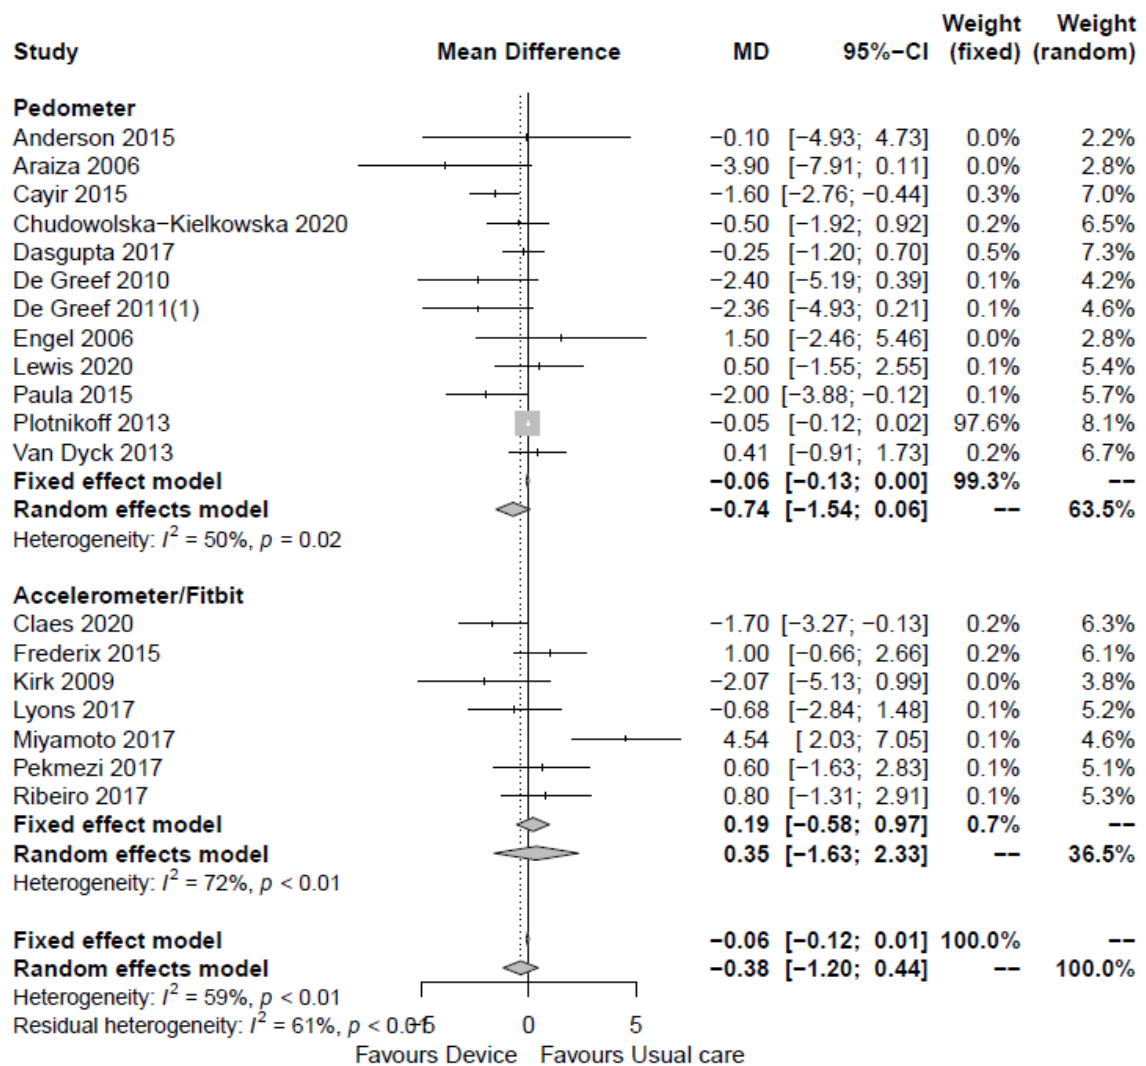



Weight (kg)

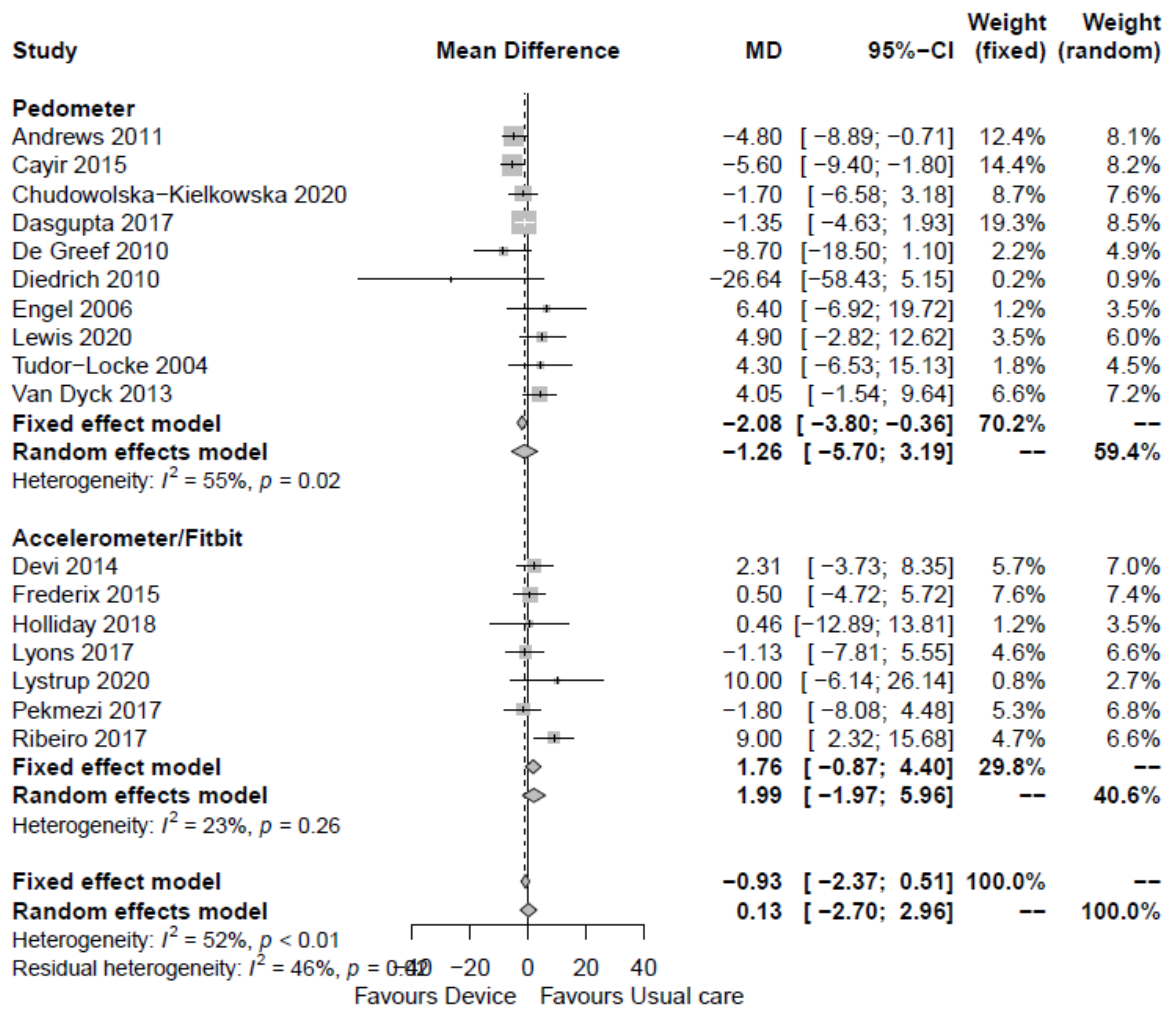

eTable 1: Search strategies

Medline

| # ▲ | Searches                                                                                                           | Results |
|-----|--------------------------------------------------------------------------------------------------------------------|---------|
| 1   | Cardiovascular Diseases/                                                                                           | 152632  |
| 2   | (cardiovascular adj1 disease\$).tw.                                                                                | 150229  |
| 3   | cardiovascular risk factor\$.tw.                                                                                   | 31197   |
| 4   | exp heart diseases/                                                                                                | 1146729 |
| 5   | exp Coronary Artery Bypass/                                                                                        | 53473   |
| 6   | exp Myocardial Revascularization/                                                                                  | 92869   |
| 7   | exp heart transplantation/                                                                                         | 36070   |
| 8   | Percutaneous Coronary Intervention/ or Angioplasty, Balloon, Coronary/                                             | 54555   |
| 9   | Heart Valve Prosthesis/                                                                                            | 36394   |
| 10  | Pulmonary embolism/                                                                                                | 39358   |
| 11  | ((myocardial or cardiac or heart) adj2 (infarct* or isch?emi*)).tw.                                                | 239817  |
| 12  | (coronary adj2 (syndrome* or disease* or event* or occlusion* or stenosis* or thrombo*)).tw.                       | 178348  |
| 13  | (myocard* adj2 revasculari?ation).tw.                                                                              | 5352    |
| 14  | (STEMI or NSTEMI).tw.                                                                                              | 10192   |
| 15  | (ST adj2 (elevat* or depress*)).tw.                                                                                | 29827   |
| 16  | "heart transplant*".tw.                                                                                            | 21509   |
| 17  | angina.tw.                                                                                                         | 49402   |
| 18  | (heart adj2 (failure or attack or bypass or disease*)).tw.                                                         | 294547  |
| 19  | ((heart or cardiac or myocard*) adj2 (fail* or insufficien* or decomp*)).tw.                                       | 168633  |
| 20  | (HFpEF or HFrEF or left ventricular ejection fraction or ((preserved or reduced) adj ejection fraction)).tw.       | 28582   |
| 21  | (LV dysfunction or (diastolic adj (dysfunction* or failure*)) or (systolic adj (dysfunction* or failure*))).tw.    | 17690   |
| 22  | pulmonary embolism*.tw.                                                                                            | 29722   |
| 23  | CABG.tw.                                                                                                           | 16083   |
| 24  | (coronary adj2 bypass).tw.                                                                                         | 43973   |
| 25  | PTCA.tw.                                                                                                           | 6211    |
| 26  | angioplast*.tw.                                                                                                    | 40523   |
| 27  | PCI.tw.                                                                                                            | 22324   |
| 28  | (Percutaneous adj2 intervention*).tw.                                                                              | 32511   |
| 29  | (stent* adj3 (heart or cardiac*)).tw.                                                                              | 805     |
| 30  | (heart valve adj1 (device* or artificial or prosthesis)).tw.                                                       | 667     |
| 31  | cardiomyopath*.tw.                                                                                                 | 63613   |
| 32  | cardiovascular disease*.tw.                                                                                        | 149898  |
| 33  | or/1-32                                                                                                            | 1570796 |
| 34  | Diabetes mellitus/                                                                                                 | 119569  |
| 35  | diabet*.ti.                                                                                                        | 306993  |
| 36  | exp Diabetes Mellitus, Type 2/                                                                                     | 137087  |
| 37  | ((type 2 or type ii) adj2 diabet*).ti,ab.                                                                          | 124078  |
| 38  | ((non insulin* depend* or non insulin* depend* or non-insulin?depend* or non insulin?depend*) adj1 diabet*).ti,ab. | 9807    |
| 39  | (T2DM or T2D or T1DM or T1D or NIDDM or MODY or MODM or AODM).ti,ab.                                               | 31996   |
| 40  | ((obes* or overweight) adj5 diabet*).ti,ab.                                                                        | 39051   |

|    |                                                                                                                                                                                                                                                                                                                                                                                        |             |
|----|----------------------------------------------------------------------------------------------------------------------------------------------------------------------------------------------------------------------------------------------------------------------------------------------------------------------------------------------------------------------------------------|-------------|
| 41 | prediabetic state/                                                                                                                                                                                                                                                                                                                                                                     | 7067        |
| 42 | (prediabetes or pre diabetes or raised glucose intolerance or impaired glucose level\$ or impaired glucose tolerance or IGT or impaired fasting glucose or IFT or FPG or fasting plasma glucose or impaired glucose regulation or impaired glucose metabolism or raised glycated haemoglobin or raised glycated hemoglobin or high glycated Hb or hyperglycaemia or hyperglycemia).tw. | 75450       |
| 43 | ((prevent* or avoid* or delay* or decreas* or reduc*) adj2 (type II diabetes or type 2 diabetes or T2D or DM or diabetes)).ti,ab.                                                                                                                                                                                                                                                      | 12238       |
| 44 | or/34-43                                                                                                                                                                                                                                                                                                                                                                               | 463396      |
| 45 | exp Obesity/                                                                                                                                                                                                                                                                                                                                                                           | 218805      |
| 46 | Obese.tw.                                                                                                                                                                                                                                                                                                                                                                              | 112489      |
| 47 | exp Overweight/                                                                                                                                                                                                                                                                                                                                                                        | 225397      |
| 48 | (BMI or body mass index).af.                                                                                                                                                                                                                                                                                                                                                           | 255484      |
| 49 | Weight gain/                                                                                                                                                                                                                                                                                                                                                                           | 31929       |
| 50 | (Overweight or over weight or obesity or adipose).af.                                                                                                                                                                                                                                                                                                                                  | 416529      |
| 51 | exp Obesity/pc                                                                                                                                                                                                                                                                                                                                                                         | 19636       |
| 52 | (body mass index or BMI).mp.                                                                                                                                                                                                                                                                                                                                                           | 254344      |
| 53 | or/45-52                                                                                                                                                                                                                                                                                                                                                                               | 595592      |
| 54 | Randomized Controlled Trial/                                                                                                                                                                                                                                                                                                                                                           | 520611      |
| 55 | Clinical Trial/                                                                                                                                                                                                                                                                                                                                                                        | 526309      |
| 56 | randomized controlled trial.pt. or randomised controlled trial.mp. [mp=title, abstract, original title, name of substance word, subject heading word, floating sub-heading word, keyword heading word, organism supplementary concept word, protocol supplementary concept word, rare disease supplementary concept word, unique identifier, synonyms]                                 | 525725      |
| 57 | controlled clinical trial.pt.                                                                                                                                                                                                                                                                                                                                                          | 93998       |
| 58 | trial*.ti,ab.                                                                                                                                                                                                                                                                                                                                                                          | 916198      |
| 59 | or/54-58                                                                                                                                                                                                                                                                                                                                                                               | 1474132     |
| 60 | pedomet*.mp.                                                                                                                                                                                                                                                                                                                                                                           | 2396        |
| 61 | ((step* or walk*) adj2 (count* or sensor or meter)).ti,ab.                                                                                                                                                                                                                                                                                                                             | 2850        |
| 62 | Accelerometry/ or (accelerom* or actimeter or actigraph or actiwatch or GT3X or fitbit).ti,ab.                                                                                                                                                                                                                                                                                         | 16461       |
| 63 | ((activit* or move* or motion or energy or exercise) adj2 (monitor* or sens* or detect* or count*)).tw.                                                                                                                                                                                                                                                                                | 63488       |
| 64 | or/60-63                                                                                                                                                                                                                                                                                                                                                                               | 81215       |
| 65 | 33 or 44 or 53                                                                                                                                                                                                                                                                                                                                                                         | 2390948     |
| 66 | 59 and 64 and 65                                                                                                                                                                                                                                                                                                                                                                       | 2120        |
| 67 | <b>limit 66 to yr="2000 - current"</b>                                                                                                                                                                                                                                                                                                                                                 | <b>1926</b> |



## Embase

| # ▲ | Searches                                                                                                                                                                                                                                                                                                                                                                                                                                                                 | Results |
|-----|--------------------------------------------------------------------------------------------------------------------------------------------------------------------------------------------------------------------------------------------------------------------------------------------------------------------------------------------------------------------------------------------------------------------------------------------------------------------------|---------|
| 1   | Diabetes mellitus/                                                                                                                                                                                                                                                                                                                                                                                                                                                       | 548816  |
| 2   | diabet*.ti.                                                                                                                                                                                                                                                                                                                                                                                                                                                              | 459899  |
| 3   | exp Diabetes Mellitus, Type 2/                                                                                                                                                                                                                                                                                                                                                                                                                                           | 267837  |
| 4   | ((type 2 or type ii) adj2 diabet*).ti,ab.                                                                                                                                                                                                                                                                                                                                                                                                                                | 235422  |
| 5   | ((non insulin* depend* or non insulin* depend* or non-insulin?depend* or non insulin?depend*) adj1 diabet*).ti,ab.                                                                                                                                                                                                                                                                                                                                                       | 11649   |
| 6   | (T2DM or T2D or TIIDM or TIID or NIDDM or MODY or MODM or AODM).ti,ab.                                                                                                                                                                                                                                                                                                                                                                                                   | 70722   |
| 7   | ((obes* or overweight) adj5 diabet*).ti,ab.                                                                                                                                                                                                                                                                                                                                                                                                                              | 70600   |
| 8   | prediabetic state/                                                                                                                                                                                                                                                                                                                                                                                                                                                       | 14073   |
| 9   | (prediabetes or pre diabetes or pre-dm or subclinical diabetic or raised glucose intolerance or impaired glucose level\$ or impaired glucose tolerance or IGT or impaired fasting glucose or IFT or FPG or fasting plasma glucose or impaired glucose regulation or impaired glucose metabolism or raised glycated haemoglobin or raised glycated hemoglobin or high glycated Hb or hyperglycaemia or hyperglycemia or without diabet* or without diagnosed diabet*).tw. | 145300  |
| 10  | ((prevent* or avoid* or delay* or decreas* or reduc*) adj2 (type II diabetes or type 2 diabetes or T2D or DM or diabetes)).ti,ab.                                                                                                                                                                                                                                                                                                                                        | 20813   |
| 11  | or/1-10                                                                                                                                                                                                                                                                                                                                                                                                                                                                  | 1008275 |
| 12  | exp Obesity/                                                                                                                                                                                                                                                                                                                                                                                                                                                             | 532605  |
| 13  | Obese.tw.                                                                                                                                                                                                                                                                                                                                                                                                                                                                | 201114  |
| 14  | (overweight or obese or over-weight or over weight or overeating or over eating or over-eating).ti.                                                                                                                                                                                                                                                                                                                                                                      | 75901   |
| 15  | exp Overweight/                                                                                                                                                                                                                                                                                                                                                                                                                                                          | 532605  |
| 16  | (BMI or body mass index).af.                                                                                                                                                                                                                                                                                                                                                                                                                                             | 474490  |
| 17  | exp weight reduction programs/                                                                                                                                                                                                                                                                                                                                                                                                                                           | 2431    |
| 18  | Weight gain/                                                                                                                                                                                                                                                                                                                                                                                                                                                             | 87925   |
| 19  | (Overweight or over weight or obesity or adipose).af.                                                                                                                                                                                                                                                                                                                                                                                                                    | 683883  |
| 20  | exp Obesity/pc                                                                                                                                                                                                                                                                                                                                                                                                                                                           | 16147   |
| 21  | (body mass index or BMI).mp.                                                                                                                                                                                                                                                                                                                                                                                                                                             | 470733  |
| 22  | Cardiovascular Diseases/                                                                                                                                                                                                                                                                                                                                                                                                                                                 | 31817   |
| 23  | (cardiovascular or cv or cvd or vascular or coronary).tw.                                                                                                                                                                                                                                                                                                                                                                                                                | 1824792 |
| 24  | heart disease\$.tw.                                                                                                                                                                                                                                                                                                                                                                                                                                                      | 225534  |
| 25  | cardiovascular risk factor\$.tw.                                                                                                                                                                                                                                                                                                                                                                                                                                         | 56404   |
| 26  | or/12-19                                                                                                                                                                                                                                                                                                                                                                                                                                                                 | 1083238 |
| 27  | or/22-25                                                                                                                                                                                                                                                                                                                                                                                                                                                                 | 1941192 |
| 28  | Randomized Controlled Trial/                                                                                                                                                                                                                                                                                                                                                                                                                                             | 638226  |
| 29  | Clinical Trial/                                                                                                                                                                                                                                                                                                                                                                                                                                                          | 988522  |
| 30  | randomized controlled trial.pt. or randomised controlled trial.mp. [mp=title, abstract, heading word, drug trade name, original title, device manufacturer, drug manufacturer, device trade name, keyword, floating subheading word, candidate term word]                                                                                                                                                                                                                | 34253   |
| 31  | controlled clinical trial/                                                                                                                                                                                                                                                                                                                                                                                                                                               | 466002  |
| 32  | trial*.ti,ab.                                                                                                                                                                                                                                                                                                                                                                                                                                                            | 1517240 |
| 33  | pedomet*.mp.                                                                                                                                                                                                                                                                                                                                                                                                                                                             | 4327    |
| 34  | ((step* or walk*) adj2 (count* or sensor or meter)).ti,ab.                                                                                                                                                                                                                                                                                                                                                                                                               | 5971    |

|           |                                                                                                         |             |
|-----------|---------------------------------------------------------------------------------------------------------|-------------|
| 35        | Accelerometry/ or (accelerom* or actimeter or actigraph or actiwatch or GT3X or fitbit).ti,ab.          | 27313       |
| 36        | ((activit* or move* or motion or energy or exercise) adj2 (monitor* or sens* or detect* or count*)).tw. | 87436       |
| 37        | 11 or 26 or 27                                                                                          | 3397736     |
| 38        | or/28-32                                                                                                | 2324948     |
| 39        | or/33-36                                                                                                | 118012      |
| 40        | 37 and 38 and 39                                                                                        | 2234        |
| <b>41</b> | <b>limit 40 to (year="2000 - current")</b>                                                              | <b>2081</b> |

## PsycInfo

| # ▲ | Searches                                                                                                                                                                                                                                                                                                                                                                                                                                                                 | Results |
|-----|--------------------------------------------------------------------------------------------------------------------------------------------------------------------------------------------------------------------------------------------------------------------------------------------------------------------------------------------------------------------------------------------------------------------------------------------------------------------------|---------|
| 1   | Diabetes mellitus/                                                                                                                                                                                                                                                                                                                                                                                                                                                       | 5321    |
| 2   | diabet*.ti.                                                                                                                                                                                                                                                                                                                                                                                                                                                              | 14551   |
| 3   | exp Diabetes Mellitus/                                                                                                                                                                                                                                                                                                                                                                                                                                                   | 8726    |
| 4   | ((type 2 or type ii) adj2 diabet*).ti,ab.                                                                                                                                                                                                                                                                                                                                                                                                                                | 8188    |
| 5   | ((non insulin* depend* or non insulin* depend* or non-insulin?depend* or non insulin?depend*) adj1 diabet*).ti,ab.                                                                                                                                                                                                                                                                                                                                                       | 189     |
| 6   | (T2DM or T2D or TIIDM or TIID or NIDDM or MODY or MODM or AODM).ti,ab.                                                                                                                                                                                                                                                                                                                                                                                                   | 1650    |
| 7   | ((obes* or overweight) adj5 diabet*).ti,ab.                                                                                                                                                                                                                                                                                                                                                                                                                              | 2742    |
| 8   | prediabetic state.tw.                                                                                                                                                                                                                                                                                                                                                                                                                                                    | 11      |
| 9   | (prediabetes or pre diabetes or pre-dm or subclinical diabetic or raised glucose intolerance or impaired glucose level\$ or impaired glucose tolerance or IGT or impaired fasting glucose or IFT or FPG or fasting plasma glucose or impaired glucose regulation or impaired glucose metabolism or raised glycated haemoglobin or raised glycated hemoglobin or high glycated Hb or hyperglycaemia or hyperglycemia or without diabet* or without diagnosed diabet*).tw. | 4208    |
| 10  | ((prevent* or avoid* or delay* or decreas* or reduc*) adj2 (type II diabetes or type 2 diabetes or T2D or DM or diabetes)).ti,ab.                                                                                                                                                                                                                                                                                                                                        | 1202    |
| 11  | or/1-10                                                                                                                                                                                                                                                                                                                                                                                                                                                                  | 22859   |
| 12  | exp Obesity/                                                                                                                                                                                                                                                                                                                                                                                                                                                             | 25230   |
| 13  | Obese.tw.                                                                                                                                                                                                                                                                                                                                                                                                                                                                | 16441   |
| 14  | (overweight or obese or over-weight or over weight or overeating or over eating or over-eating).ti.                                                                                                                                                                                                                                                                                                                                                                      | 7144    |
| 15  | exp Overweight/                                                                                                                                                                                                                                                                                                                                                                                                                                                          | 26664   |
| 16  | (BMI or body mass index).af.                                                                                                                                                                                                                                                                                                                                                                                                                                             | 62048   |
| 17  | Weight gain/                                                                                                                                                                                                                                                                                                                                                                                                                                                             | 3210    |
| 18  | (Overweight or over weight or obesity or adipose).af.                                                                                                                                                                                                                                                                                                                                                                                                                    | 136755  |
| 19  | (body mass index or BMI).mp.                                                                                                                                                                                                                                                                                                                                                                                                                                             | 33283   |
| 20  | exp Cardiovascular Disorders/                                                                                                                                                                                                                                                                                                                                                                                                                                            | 63480   |
| 21  | (cardiovascular or cv or cvd or vascular or coronary).tw.                                                                                                                                                                                                                                                                                                                                                                                                                | 57571   |
| 22  | heart disease\$.tw.                                                                                                                                                                                                                                                                                                                                                                                                                                                      | 10469   |
| 23  | cardiovascular risk factor\$.tw.                                                                                                                                                                                                                                                                                                                                                                                                                                         | 2354    |
| 24  | or/12-19                                                                                                                                                                                                                                                                                                                                                                                                                                                                 | 156833  |
| 25  | Randomized Controlled Trial.mp.                                                                                                                                                                                                                                                                                                                                                                                                                                          | 19510   |
| 26  | randomized controlled trial.pt. or randomised controlled trial.mp. [mp=title, abstract, heading word, table of contents, key concepts, original title, tests & measures, mesh]                                                                                                                                                                                                                                                                                           | 3827    |
| 27  | trial*.ti,ab.                                                                                                                                                                                                                                                                                                                                                                                                                                                            | 187204  |
| 28  | pedomet*.mp.                                                                                                                                                                                                                                                                                                                                                                                                                                                             | 898     |
| 29  | ((step* or walk*) adj2 (count* or sensor or meter)).ti,ab.                                                                                                                                                                                                                                                                                                                                                                                                               | 795     |
| 30  | Accelerometry/ or (accelerom* or actimeter or actigraph or actiwatch or GT3X).ti,ab.                                                                                                                                                                                                                                                                                                                                                                                     | 4253    |
| 31  | ((activit* or move* or motion or energy or exercise) adj2 (monitor* or sens* or detect* or count*)).tw.                                                                                                                                                                                                                                                                                                                                                                  | 12367   |
| 32  | 11 or 24                                                                                                                                                                                                                                                                                                                                                                                                                                                                 | 170531  |
| 33  | 25 or 26 or 27                                                                                                                                                                                                                                                                                                                                                                                                                                                           | 187468  |
| 34  | 28 or 29 or 30 or 31                                                                                                                                                                                                                                                                                                                                                                                                                                                     | 17347   |

|           |                                       |            |
|-----------|---------------------------------------|------------|
| 35        | 32 and 33 and 34                      | 495        |
| <b>36</b> | <b>limit 35 to yr="2000 -Current"</b> | <b>492</b> |

**CENTRAL**

| # ▲ | Searches                                                                                                                                                                                                                                                                                                                                                                                                                                                                 | Results     |
|-----|--------------------------------------------------------------------------------------------------------------------------------------------------------------------------------------------------------------------------------------------------------------------------------------------------------------------------------------------------------------------------------------------------------------------------------------------------------------------------|-------------|
| 1   | Diabetes mellitus/                                                                                                                                                                                                                                                                                                                                                                                                                                                       | 9817        |
| 2   | diabet*.ti.                                                                                                                                                                                                                                                                                                                                                                                                                                                              | 58382       |
| 3   | exp Diabetes Mellitus/                                                                                                                                                                                                                                                                                                                                                                                                                                                   | 31706       |
| 4   | ((type 2 or type ii) adj2 diabet*).ti,ab.                                                                                                                                                                                                                                                                                                                                                                                                                                | 38918       |
| 5   | ((non insulin* depend* or non insulin* depend* or non-insulin?depend* or non insulin?depend*) adj1 diabet*).ti,ab.                                                                                                                                                                                                                                                                                                                                                       | 1965        |
| 6   | (T2DM or T2D or TIIDM or TIID or NIDDM or MODY or MODM or AODM).ti,ab.                                                                                                                                                                                                                                                                                                                                                                                                   | 10948       |
| 7   | ((obes* or overweight) adj5 diabet*).ti,ab.                                                                                                                                                                                                                                                                                                                                                                                                                              | 6269        |
| 8   | prediabetic state.tw.                                                                                                                                                                                                                                                                                                                                                                                                                                                    | 31          |
| 9   | (prediabetes or pre diabetes or pre-dm or subclinical diabetic or raised glucose intolerance or impaired glucose level\$ or impaired glucose tolerance or IGT or impaired fasting glucose or IFT or FPG or fasting plasma glucose or impaired glucose regulation or impaired glucose metabolism or raised glycated haemoglobin or raised glycated hemoglobin or high glycated Hb or hyperglycaemia or hyperglycemia or without diabet* or without diagnosed diabet*).tw. | 17285       |
| 10  | ((prevent* or avoid* or delay* or decreas* or reduc*) adj2 (type II diabetes or type 2 diabetes or T2D or DM or diabetes)).ti,ab.                                                                                                                                                                                                                                                                                                                                        | 4520        |
| 11  | or/1-10                                                                                                                                                                                                                                                                                                                                                                                                                                                                  | 80240       |
| 12  | exp Obesity/                                                                                                                                                                                                                                                                                                                                                                                                                                                             | 14067       |
| 13  | Obese.tw.                                                                                                                                                                                                                                                                                                                                                                                                                                                                | 23680       |
| 14  | (overweight or obese or over-weight or over weight or overeating or over eating or over-eating).ti.                                                                                                                                                                                                                                                                                                                                                                      | 14192       |
| 15  | exp Overweight/                                                                                                                                                                                                                                                                                                                                                                                                                                                          | 15901       |
| 16  | (BMI or body mass index).af.                                                                                                                                                                                                                                                                                                                                                                                                                                             | 64683       |
| 17  | Weight gain/                                                                                                                                                                                                                                                                                                                                                                                                                                                             | 2496        |
| 18  | (Overweight or over weight or obesity or adipose).af.                                                                                                                                                                                                                                                                                                                                                                                                                    | 48579       |
| 19  | (body mass index or BMI).mp.                                                                                                                                                                                                                                                                                                                                                                                                                                             | 64681       |
| 20  | (cardiovascular or cv or cvd or vascular or coronary).tw.                                                                                                                                                                                                                                                                                                                                                                                                                | 139427      |
| 21  | heart disease\$.tw.                                                                                                                                                                                                                                                                                                                                                                                                                                                      | 17801       |
| 22  | cardiovascular risk factor\$.tw.                                                                                                                                                                                                                                                                                                                                                                                                                                         | 5514        |
| 23  | or/12-22                                                                                                                                                                                                                                                                                                                                                                                                                                                                 | 95752       |
| 24  | pedomet*.mp.                                                                                                                                                                                                                                                                                                                                                                                                                                                             | 1861        |
| 25  | ((step* or walk*) adj2 (count* or sensor or meter)).ti,ab.                                                                                                                                                                                                                                                                                                                                                                                                               | 1940        |
| 26  | Accelerometry/ or (accelerom* or actimeter or actigraph or actiwatch or GT3X or fitbit).ti,ab.                                                                                                                                                                                                                                                                                                                                                                           | 5008        |
| 27  | ((activit* or move* or motion or energy or exercise) adj2 (monitor* or sens* or detect* or count*)).tw.                                                                                                                                                                                                                                                                                                                                                                  | 7415        |
| 28  | 11 or 23                                                                                                                                                                                                                                                                                                                                                                                                                                                                 | 106036      |
| 29  | 24 or 25 or 26 or 27                                                                                                                                                                                                                                                                                                                                                                                                                                                     | 9390        |
| 30  | 28 and 29                                                                                                                                                                                                                                                                                                                                                                                                                                                                | 1210        |
| 31  | <b>limit 30 to yr="2000 - current"</b>                                                                                                                                                                                                                                                                                                                                                                                                                                   | <b>1171</b> |

## eTable 2: Citations of eligible studies for review

1. Anderson D.R. *Health Beliefs, Will to Live, Hope, and Social Support in a Pedometer-Based Exercise Intervention among Cardiac Rehabilitation Patients*. 2015. Available at: [https://etd.ohiolink.edu/!etd.send\\_file?accession=osu1434901973&disposition=inline](https://etd.ohiolink.edu/!etd.send_file?accession=osu1434901973&disposition=inline).
2. Alonso-Domínguez R, Patino-Alonso MC, Sánchez-Aguadero N, García-Ortiz L, Recio-Rodríguez JI, Gómez-Marcos MA. Effect of a multifactorial intervention on the increase in physical activity in subjects with type 2 diabetes mellitus: a randomized clinical trial (EMID Study). *Eur J Cardiovasc Nurs*. 2019;18(5):399-409.
3. Andrews R, Cooper A, Montgomery A, et al. Diet or diet plus physical activity versus usual care in patients with newly diagnosed type 2 diabetes: The Early ACTID randomised controlled trial. *The Lancet*. 2011;378(9786):129-139.
4. Araiza P, Hewes H, Gashetewa C, Vella CA, Burge MR. Efficacy of a pedometer-based physical activity program on parameters of diabetes control in type 2 diabetes mellitus. *Metabolism*. 2006;55(10):1382-1387.
5. Bjorgaas MR, Vik JT, Stolen T, Lydersen S, Grill V. Regular use of pedometer does not enhance beneficial outcomes in a physical activity intervention study in type 2 diabetes mellitus. *Metabolism*. 2008;57(5):605-611.
6. Chudowolska-Kielkowska M, Małek Ł A. A nurse-led intervention to promote physical activity in sedentary older adults with cardiovascular risk factors: a randomized clinical trial (STEP-IT-UP study). *Eur J Cardiovasc Nurs*. 2020;19(7):638-645.
7. Claes J, Cornelissen V, McDermott C, et al. Feasibility, Acceptability, and Clinical Effectiveness of a Technology-Enabled Cardiac Rehabilitation Platform (Physical Activity Toward Health-I): Randomized Controlled Trial. *J Med Internet Res*. 2020;22(2):e14221.
8. Cupples ME, Dean A, Tully MA, et al. A feasibility study of a randomized controlled trial of a pedometer based exercise intervention to promote physical activity in cardiac rehabilitation. *Eur J Prev Cardiol*. 2012;1):S29.
9. Dasgupta K, Rosenberg E, Joseph L, et al. Physician step prescription and monitoring to improve ARTERial health (SMARTER): a randomized controlled trial in patients with type 2 diabetes and hypertension. *Diabetes Obes Metab*. 2017(pagination).
10. De Greef K, Deforche B, Tudor-Locke C, De Bourdeaudhuij I. A cognitive-behavioural pedometer-based group intervention on physical activity and sedentary behaviour in individuals with type 2 diabetes. *Health Educ Res*. 2010;25(5):724-736.
11. De Greef K, Deforche B, Tudor-Locke C, De Bourdeaudhuij I. Increasing physical activity in Belgian type 2 diabetes patients: a three-arm randomized controlled trial. *Int J Behav Med*. 2011;18(3):188-198.

12. De Greef KP, Deforche BI, Ruige JB, et al. The effects of a pedometer-based behavioral modification program with telephone support on physical activity and sedentary behavior in type 2 diabetes patients. *Patient Education and Counseling*. 2011;84(2):275-279.
13. Diedrich A, Munroe DJ, Romano M. Promoting physical activity for persons with diabetes. *Diabetes Educ*. 2010;36(1):132-140.
14. Engel L, Lindner H. Impact of using a pedometer on time spent walking in older adults with type 2 diabetes. *Diabetes Educ*. 2006;32(1):98-107.
15. Fayehun AF, Olowookere OO, Ogunbode AM, Adetunji AA, Esan A. Walking prescription of 10 000 steps per day in patients with type 2 diabetes mellitus: A randomised trial in Nigerian general practice. *Br J Gen Pract*. 2018;68(667):e139-e145.
16. Frederix I, Hansen D, Coninx K, et al. Medium-Term Effectiveness of a Comprehensive Internet-Based and Patient-Specific Telerehabilitation Program With Text Messaging Support for Cardiac Patients: Randomized Controlled Trial. *J Med Internet Res*. 2015;17(7):e185.
17. Greaney ML, Askew S, Wallington SF, Foley PB, Quintiliani LM, Bennett GG. The effect of a weight gain prevention intervention on moderate-vigorous physical activity among black women: the Shape Program. *Int*. 2017;14(1):139.
18. Grey EB, Thompson D, Gillison FB. Effects of a Web-Based, Evolutionary Mismatch-Framed Intervention Targeting Physical Activity and Diet: a Randomised Controlled Trial. *Int J Behav Med*. 2019;26(6):645-657.
19. Guiraud T, Granger R, Gremeaux V, et al. Telephone support oriented by accelerometric measurements enhances adherence to physical activity recommendations in noncompliant patients after a cardiac rehabilitation program. *Arch Phys Med Rehabil*. 2012;93(12):2141-2147.
20. Houle J, Doyon O, Vadeboncoeur N, Turbide G, Diaz A, Poirier P. Innovative program to increase physical activity following an acute coronary syndrome: randomized controlled trial. *Patient Educ Couns*. 2011;85(3):e237-244.
21. Houle J, Doyon O, Vadeboncoeur N, Turbide G, Diaz A, Poirier P. Effectiveness of a pedometer-based program using a socio-cognitive intervention on physical activity and quality of life in a setting of cardiac rehabilitation. *Can J Cardiol*. 2012;28(1):27-32.
22. Karstoft K, Winding K, Knudsen SH, et al. The effects of free-living interval-walking training on glycemic control, body composition, and physical fitness in type 2 diabetic patients: a randomized, controlled trial. *Diabetes Care*. 2013;36(2):228-236.
23. Katzmarzyk PT, Champagne CM, Tudor-Locke C, et al. A short-term physical activity randomized trial in the Lower Mississippi Delta. *PLoS ONE*. 2011;6(10):e26667.
24. Kirk A, Barnett J, Leese G, Mutrie N. A randomized trial investigating the 12-month changes in physical activity and health outcomes following a physical

- activity consultation delivered by a person or in written form in Type 2 diabetes: Time2Act. *Diabet Med*. 2009;26(3):293-301.
25. Lewis ZH, Ottenbacher KJ, Fisher SR, et al. Effect of Electronic Activity Monitors and Pedometers on Health: Results from the TAME Health Pilot Randomized Pragmatic Trial. *Int J Environ Res Public Health*. 2020;17(18).
  26. Lyons EJ, Swartz MC, Lewis ZH, Martinez E, Jennings K. Feasibility and Acceptability of a Wearable Technology Physical Activity Intervention With Telephone Counseling for Mid-Aged and Older Adults: A Randomized Controlled Pilot Trial. *JMIR Mhealth Uhealth*. 2017;5(3):e28.
  27. Lystrup R, Carlsen D, Sharon DJ, Crawford P. Wearable and interactive technology to share fitness goals results in weight loss but not improved diabetes outcomes. *Obes Res Clin Pract*. 2020;14(5):443-448.
  28. Martin SS, Feldman DI, Blumenthal RS, et al. mActive: A Randomized Clinical Trial of an Automated mHealth Intervention for Physical Activity Promotion. *J Am Heart Assoc*. 2015;4(11):09.
  29. Miyamoto T, Fukuda K, Oshima Y, Moritani T. Non-locomotive physical activity intervention using a tri-axial accelerometer reduces sedentary time in type 2 diabetes. *Phys Sportsmed*. 2017;45(3):245-251.
  30. Paschali AA, Goodrick GK, Kalantzi-Azizi A, Papadatou D, Balasubramanyam A. Accelerometer feedback to promote physical activity in adults with type 2 diabetes: a pilot study. *Percept Mot Skills*. 2005;100(1):61-68.
  31. Paula TP, Viana LV, Neto ATZ, Leitao CB, Gross JL, Azevedo MJ. Effects of the DASH Diet and Walking on Blood Pressure in Patients With Type 2 Diabetes and Uncontrolled Hypertension: A Randomized Controlled Trial. *J Clin Hypertens (Greenwich)*. 2015;17(11):895-901.
  32. Pekmezi D, Ainsworth C, Joseph RP, et al. Pilot Trial of a Home-based Physical Activity Program for African American Women. *Med Sci Sports Exerc*. 2017;49(12):2528-2536.
  33. Piette JD, Richardson C, Himle J, et al. A randomized trial of telephonic counseling plus walking for depressed diabetes patients. *Med Care*. 2011;49(7):641-648.
  34. Plotnikoff R, Karunamuni N, Courneya K, Sigal R, Johnson J, Johnson S. The Alberta Diabetes and Physical Activity Trial (ADAPT): A randomized trial evaluating theory-based interventions to increase physical activity in adults with type 2 diabetes. *Ann Behav Med*. 2013;45(1):45-56.
  35. Silfee V, Petosa R, Laurent D, Schaub T, Focht B. Effect of a behavioral intervention on dimensions of self-regulation and physical activity among overweight and obese adults with type 2 diabetes: a pilot study. *Psychol Health Med*. 2016;21(6):715-723.
  36. Tudor-Locke C, Bell R, Myers A, et al. Controlled outcome evaluation of the First Step Program: A daily physical activity intervention for individuals with type II diabetes. *Int J Obes (Lond)*. 2004;28(1):113-119.



37. Van Dyck D, De Greef K, Deforche B, et al. The relationship between changes in steps/day and health outcomes after a pedometer-based physical activity intervention with telephone support in type 2 diabetes patients. *Health Educ Res.* 2013;28(3):539-545.
38. Yates T, Davies M, Gorely T, Bull F, Khunti K. Effectiveness of a pragmatic education program designed to promote walking activity in individuals with impaired glucose tolerance: a randomized controlled trial. *Diabetes Care.* 2009;32(8):1404-1410.
39. Yates T, Edwardson CL, Henson J, et al. Walking Away from Type 2 diabetes: a cluster randomized controlled trial. *Diabet Med.* 2017;34(5):698-707.

eTable 3: Summary of intervention characteristics by study

| Study author          | Aims of intervention                                                                                                                                              | Theoretical approach | Intervention components                                                                                                                                                                                                                                                                                                              | Control components                           | Delivery method (including format and provider)                                                                                                                        | Number of sessions (time of each session) | Length of intervention (weeks) | Goals setting and uptake            |
|-----------------------|-------------------------------------------------------------------------------------------------------------------------------------------------------------------|----------------------|--------------------------------------------------------------------------------------------------------------------------------------------------------------------------------------------------------------------------------------------------------------------------------------------------------------------------------------|----------------------------------------------|------------------------------------------------------------------------------------------------------------------------------------------------------------------------|-------------------------------------------|--------------------------------|-------------------------------------|
| <b>Pedometers</b>     |                                                                                                                                                                   |                      |                                                                                                                                                                                                                                                                                                                                      |                                              |                                                                                                                                                                        |                                           |                                |                                     |
| Alonso-Dominguez 2019 | To assess the effect of a multifactorial intervention approach based on a smartphone app, walking, and a diet workshop on physical activity in subjects with T2DM | NA                   | <p>Counselling on physical activity was provided for all participants for 5 minutes and included advice on compliance with the current international recommendations (to walk at least 10,000 steps daily and avoid a sedentary lifestyle).</p> <p>Physical activity was objectively recorded for Seven consecutive days using a</p> | Participants were given a leaflet as support | All study participants received standardised counselling for 10 minutes on physical activity and a healthy diet combined (5 mins physical activity and 5 mins on diet) | 10 mins counselling                       | 3 months                       | <p>10,000 steps a day</p> <p>NR</p> |

|               |                                                                                                                                                                                      |    |                                                                                                                 |                                                                                                        |                                                                             |                                                                           |          |           |
|---------------|--------------------------------------------------------------------------------------------------------------------------------------------------------------------------------------|----|-----------------------------------------------------------------------------------------------------------------|--------------------------------------------------------------------------------------------------------|-----------------------------------------------------------------------------|---------------------------------------------------------------------------|----------|-----------|
|               |                                                                                                                                                                                      |    | digital pedometer with two piezoelectric sensors (Omron HJ-321 Tri-axis) placed on the right side of the waist. |                                                                                                        |                                                                             |                                                                           |          |           |
| Anderson 2015 | To evaluate the effect of pedometer tracking on exercise adherence among post-Cardiac rehabilitation patients in a randomized study with control participants engaging in usual care | NA | Pedometer worn daily with logbook use to record steps                                                           | NR                                                                                                     | Unsupervised pedometer tracking after CR is complete. By specialist staff   | 1 at the beginning of the study                                           | 12       | NA<br>NR  |
| Andrews 2011  | To investigate the effects of diet and physical activity on blood pressure and glucose concentrations                                                                                | NA | Each patient was given a pedometer (Digiwalker CW200, Yamax, Japan) and a folder containing                     | Usual care consisted of standard dietary and exercise advice after randomisation and at the end of the | The diet was not prescriptive; goals were negotiated individually with each | Dietary advice and goal setting was reinforced by nine 30 min appointment | 6 months | NR<br>98% |

|             |                                                                                                                                                                                                                                       |    |                                                                                                                                                                             |                                                                                                                                |                                                                                                                                                                                                             |                                                                                    |   |                  |
|-------------|---------------------------------------------------------------------------------------------------------------------------------------------------------------------------------------------------------------------------------------|----|-----------------------------------------------------------------------------------------------------------------------------------------------------------------------------|--------------------------------------------------------------------------------------------------------------------------------|-------------------------------------------------------------------------------------------------------------------------------------------------------------------------------------------------------------|------------------------------------------------------------------------------------|---|------------------|
|             |                                                                                                                                                                                                                                       |    | <p>motivating literature and pages for recording daily physical activity (pedometer readings)</p>                                                                           | <p>study, with reviews by a study doctor and nurse at baseline and at 6 and 12 months. This group was used as the control.</p> | <p>participant during their first session with the dietitian and were reviewed at each visit. Participants saw the dietitian for 1 h at randomisation and for 30 min at each of 3, 6, 9, and 12 months.</p> | <p>s with study nurses—roughly one every 6 weeks over the course of the study.</p> |   |                  |
| Araiza 2006 | <p>Determine whether a recommendation to accumulate 10,000 steps per day would result in significant improvements in parameters of glycaemic control, insulin sensitivity, cardiovascular risk, and oxidative stress in sedentary</p> | NA | <p>Each participant wore a pedometer throughout the day and was trained how to use it. Pedometers were positioned on the waist. Steps were recorded in an activity log.</p> | <p>Instructed to maintain their normal activity habits throughout the 6-week intervention</p>                                  | <p>In active group participants were instructed to walk 10,000 steps on 5 or more days of the week for 6 weeks.</p>                                                                                         | NA - self monitored                                                                | 6 | <p>NA<br/>NR</p> |

|                             |                                                                                                                                                                                                                                                   |    |                                                                                                                                                                                                                     |                                                                                                                            |                                                                                                      |                      |          |                                                                                                      |
|-----------------------------|---------------------------------------------------------------------------------------------------------------------------------------------------------------------------------------------------------------------------------------------------|----|---------------------------------------------------------------------------------------------------------------------------------------------------------------------------------------------------------------------|----------------------------------------------------------------------------------------------------------------------------|------------------------------------------------------------------------------------------------------|----------------------|----------|------------------------------------------------------------------------------------------------------|
|                             | patients with type 2 diabetes                                                                                                                                                                                                                     |    |                                                                                                                                                                                                                     |                                                                                                                            |                                                                                                      |                      |          |                                                                                                      |
| Bjorgaas 2008               | Determine whether regular use of pedometers increases walking and/or enhances health related beneficial effect in type 2 diabetic participants                                                                                                    | NA | Pedometer and logbook 3 weekdays twice per month                                                                                                                                                                    | Participants were encouraged to increase the average daily time spent walking from one visit to another, guided by logbook | Participants meet FTF with study nurse baseline, 1 month, 3 months and 6 months                      | NR                   | 26       | Goals were set at every nurse meeting after baseline<br><br>68% completion rate amongst participants |
| Chudowolska-Kielkowska 2020 | A randomized clinical trial of a nurse-led intervention that included goal setting and phone support to increase physical activity in sedentary older adults with cardiovascular risk factor in primary care setting compared to standard of care | NA | All randomized subjects received a simple pedometer (M2 Smart band, Enwei Technology Co. Ltd., Shenzhen, China) and were told to note the number of steps per day in a handed notebook. Subjects in the study group | Usual care with no step goal or supportive calls                                                                           | 10-min nurse-led tutorial with distributed hand outs on health benefits of regular physical activity | 1 session with nurse | 3 months | Minimum 7,000 steps per day                                                                          |

|               |                                                                                                                                |    |                                                                                                                                                                  |                                                                                          |                                                                                                                |                                                                                                                  |    |                                                                                                    |
|---------------|--------------------------------------------------------------------------------------------------------------------------------|----|------------------------------------------------------------------------------------------------------------------------------------------------------------------|------------------------------------------------------------------------------------------|----------------------------------------------------------------------------------------------------------------|------------------------------------------------------------------------------------------------------------------|----|----------------------------------------------------------------------------------------------------|
|               |                                                                                                                                |    | were told to achieve a goal of minimum 7000 steps per day, while the control group did not have a set goal and was just told to note the number of steps per day |                                                                                          |                                                                                                                |                                                                                                                  |    |                                                                                                    |
| Cupples 2013  | Examine the use of pedometer step count goals to promote physical activity for cardiac rehabilitation patients                 | NA | Pedometer, dairy to record step counts with feedback from facilitator                                                                                            | Facilitator recorded baseline pedometer data, but no feedback information was given      | Face-to-face or by telephone, facilitator contact made weekly                                                  | Weekly contact with the facilitator                                                                              | 6  | Gradual 10% increase in average daily count aiming for 10,000 steps/day<br><br>93% completion rate |
| Dasgupta 2017 | Impact of intervention on physical activity, but also gauge biological effects by evaluating several cardio-metabolic measures | NA | To achieve a net increase over baseline of 3000 steps/day over 1 year using a pedometer, step count log and step count prescription                              | Received advice to engage in 30 to 60 mins of activity daily, consistent with usual care | Participants were typically seen by their physician in a clinical setting 3-4 times over a 12-15-month period. | 3-4 times over a 12-15-month period. Time per session unclear for intervention group, in control group they were | 52 | 3000 steps/day increase over 1 year<br><br>79% completion rate                                     |

|                   |                                                                                                                               |                                                                                                                      |                                                                                     |                                                                                                                                                                              |                                                                                                                  |                                                                                                                          |    |                                                                  |
|-------------------|-------------------------------------------------------------------------------------------------------------------------------|----------------------------------------------------------------------------------------------------------------------|-------------------------------------------------------------------------------------|------------------------------------------------------------------------------------------------------------------------------------------------------------------------------|------------------------------------------------------------------------------------------------------------------|--------------------------------------------------------------------------------------------------------------------------|----|------------------------------------------------------------------|
|                   |                                                                                                                               |                                                                                                                      |                                                                                     |                                                                                                                                                                              |                                                                                                                  | engaged in 30-40 mins of activity                                                                                        |    |                                                                  |
| De Greef 2010     | Investigate the benefits of a pedometer and a cognitive behavioural intervention for promoting PA in type 2 diabetes patients | Cognitive-behavioural therapy                                                                                        | Received pedometer and a pedometer diary during intervention as motivational tools. | Received usual care from their endocrinologist and a single education session about type 2 diabetes and PA which was the same as the first session of the intervention group | Group meetings which involved motivational interviewing, then an implementation plan was developed with coaches. | 90-min group meetings, first three given every 2 weeks, the last two sessions were given over interval of 3 and 4 weeks. | 12 | At each session coaches set new goals<br><br>75% compliance rate |
| De Greef 2011 (1) | To promote PA and decreasing sedentary behaviour                                                                              | Cognitive-behavioural therapy, the diabetes prevention program, the first step program and motivational interviewing | face-to-face session, a pedometer and telephone support                             | No intervention                                                                                                                                                              | face-to-face sessions and telephone support                                                                      | Seven call into total and one interview                                                                                  | 24 | >10,000 steps/day<br><br>96% completion rate                     |
| De Greef 2011 (2) | Investigate whether a 12-week pedometer-based PA intervention delivered by a                                                  | NA                                                                                                                   | Pedometer and diary to keep log of type of PA, duration and number of steps/days    | No intervention, only received general care from GP                                                                                                                          | face-to-face delivery by GP or behaviour expert                                                                  | 90-min group counselling sessions over a 12-week period (one session every 3 weeks).                                     | 12 | NA<br><br>NR                                                     |

|               |                                                                                                                                                                                                                         |    |                                                                                                                                   |                                                    |                                                                                                                                                                                                                            |                                                                               |    |                                                |
|---------------|-------------------------------------------------------------------------------------------------------------------------------------------------------------------------------------------------------------------------|----|-----------------------------------------------------------------------------------------------------------------------------------|----------------------------------------------------|----------------------------------------------------------------------------------------------------------------------------------------------------------------------------------------------------------------------------|-------------------------------------------------------------------------------|----|------------------------------------------------|
|               | trained GP individually can be as effective as group delivery by behavioural expert                                                                                                                                     |    |                                                                                                                                   |                                                    |                                                                                                                                                                                                                            | Participant in the GP delivered group received three 15-min FTF consultations |    |                                                |
| Diedrich 2010 | To see whether the self-help Manpo-Kei program can be a solution to promoting exercise in people with diabetes without adding significant content and activities to a diabetes self-management education (DSME) program | NR | Received a copy of the Manpo-Kei (guide to steps) book and concise handout summarizing the key points of the book and a pedometer | Attended usual DSME programs only                  | Initial FTF assessment by certified diabetes educators prior to attending first DSME program session. Questionnaires mailed out at 3 months. Telephone calls also made to participants to set up the follow-up appointment | DSME includes a 2-hour assessment and 8 hours of group classes                | 13 | NA<br><br>62% completion rate                  |
| Engel 2006    | Investigate the impact of using a pedometer on time spent walking                                                                                                                                                       | NR | Pedometer and exercise log to record the number of steps each day                                                                 | Health-related coaching including behaviour change | 6 face-to-face visits or contacts by facilitator during the 6                                                                                                                                                              | 6 visits each the time varied                                                 | 26 | 6000-8500 steps/d for healthy older adults and |



|              |                                                                                                                        |                                                                |                                                                                                                                          |                                                                                                                                             |                                                                                                                                      |                                                                                                                                      |    |                                                                                    |
|--------------|------------------------------------------------------------------------------------------------------------------------|----------------------------------------------------------------|------------------------------------------------------------------------------------------------------------------------------------------|---------------------------------------------------------------------------------------------------------------------------------------------|--------------------------------------------------------------------------------------------------------------------------------------|--------------------------------------------------------------------------------------------------------------------------------------|----|------------------------------------------------------------------------------------|
|              |                                                                                                                        |                                                                |                                                                                                                                          | strategies to improve self-efficiency like goal setting                                                                                     | months of study                                                                                                                      |                                                                                                                                      |    | 3500-5500 steps/d for older adults with chronic illnesses were considered as goals |
| Fayehun 2018 | To evaluate whether 10,000 steps per day is believed to be a reasonable estimate of daily activity for healthy adults  | NA                                                             | Pedometer and manual record for recording daily step counts                                                                              | Continued with typical daily activities                                                                                                     | Face-to-face and telephone                                                                                                           | Face-to-face counselling each week until they reached 10,000 steps per day, telephone follow-up was also given at weeks 2, 6 and 10. | 10 | To accumulate 10,000 steps per day for 10 weeks.<br><br>85% completion rate        |
| Greaney 2017 | Examine the impact of the shape program, a weight gain prevention program designed for black overweight or obese women | Social cognitive theory with self-efficacy as primary mediator | Individuals randomized received, a) tailored behaviour change goals to promote the prevention of weight gain, skills training materials, | Participants were mailed semi-annual newsletters during the intervention period. The newsletter covered general wellness topics but not PA, | Coaching calls and motivational interviewing. Printed skills training material were provided to participants with assigned behaviour | Measurements taken at baseline and 12 months. Sessions of PA were summaries into 1- and 10-min bouts of MVPA                         | 52 | Tailored behaviour change goals and step goals<br><br>62% completion rate          |

|           |                                                                                                                                                                                                                              |                          |                                                                                                                                                                                                                |                                                    |                                                                     |                                                                                                                                                                               |          |                                                              |
|-----------|------------------------------------------------------------------------------------------------------------------------------------------------------------------------------------------------------------------------------|--------------------------|----------------------------------------------------------------------------------------------------------------------------------------------------------------------------------------------------------------|----------------------------------------------------|---------------------------------------------------------------------|-------------------------------------------------------------------------------------------------------------------------------------------------------------------------------|----------|--------------------------------------------------------------|
|           | living in the rural South                                                                                                                                                                                                    |                          | weekly interactive voice response (IVR) telephone calls for self-monitoring, monthly telephone coaching from a registered dietitian and a no-cost 12 month membership to a YMCA facility of their choice       | nutrition of weight                                | r changes goals.                                                    |                                                                                                                                                                               |          |                                                              |
| Grey 2019 | To assess the effectiveness of the 12-week evolutionary mismatch-framed, self-directed intervention in increasing PAL and reducing EI. We also examined whether any changes in activity or diet achieved by the intervention | BCT (Taxonomy v.1, 2013) | The intervention (“Evolife”) was based around a website that aimed to provide participants with information, framed from an evolutionary mismatch perspective, about physical activity and healthy eating, and | Manual goals were set by participant individually. | Intervention websites provide all relevant intervention information | The researcher gave participants a multisensory physical activity monitor to wear for 7 days following the assessment visit, along with a 3-day food diary and set of kitchen | 12 weeks | Goals set for behaviour change<br><br>94-97% completion rate |

|  |                                                                                                                                                                                     |  |                                                                                                                                                                        |  |  |                                                                                                                                                                                                                                                                                                                                                    |  |  |
|--|-------------------------------------------------------------------------------------------------------------------------------------------------------------------------------------|--|------------------------------------------------------------------------------------------------------------------------------------------------------------------------|--|--|----------------------------------------------------------------------------------------------------------------------------------------------------------------------------------------------------------------------------------------------------------------------------------------------------------------------------------------------------|--|--|
|  | <p>were sufficient to generate clinically meaningful changes in metabolic control and/or anthropometric risk markers for developing type 2 diabetes and cardiovascular disorder</p> |  | <p>advice on how to make behavioural changes to improve health. One of the goals was a daily step goal and to help with this, participants were given a pedometer.</p> |  |  | <p>scales to also complete over the following week. Full instructions on both the activity monitor and food diary were explained by the researcher and given in printed form for the participants to take away. Activity monitors and completed food diaries were collected by the researcher approximately 8 days after each assessment (i.e.</p> |  |  |
|--|-------------------------------------------------------------------------------------------------------------------------------------------------------------------------------------|--|------------------------------------------------------------------------------------------------------------------------------------------------------------------------|--|--|----------------------------------------------------------------------------------------------------------------------------------------------------------------------------------------------------------------------------------------------------------------------------------------------------------------------------------------------------|--|--|

|                  |                                                                                                                                                                                    |                                   |                                                                                                                             |                                                                                                                               |                                                                                                                  |                                                                                                                                                                                              |    |                                                                                                                     |
|------------------|------------------------------------------------------------------------------------------------------------------------------------------------------------------------------------|-----------------------------------|-----------------------------------------------------------------------------------------------------------------------------|-------------------------------------------------------------------------------------------------------------------------------|------------------------------------------------------------------------------------------------------------------|----------------------------------------------------------------------------------------------------------------------------------------------------------------------------------------------|----|---------------------------------------------------------------------------------------------------------------------|
|                  |                                                                                                                                                                                    |                                   |                                                                                                                             |                                                                                                                               |                                                                                                                  | when the activity monitoring had been completed)                                                                                                                                             |    |                                                                                                                     |
| Houle 2011, 2012 | To evaluate the impact of a home-based cardiac rehabilitation program led by a clinical nurse specialist on PA behaviour at 3, 6, 9 and 12 months after an acute coronary syndrome | Social cognitive theory framework | Participants given pedometer (Yamax Digiwalker SW-200), diary and information regarding PA after an acute coronary syndrome | Provided with standard advice on PA at discharge                                                                              | Intervention delivered FTF by clinical nurse specialist before hospital discharge                                | Follow-up sessions included one phone call within 2 weeks after discharge and 5 FTF consultations (at 6 weeks and 3, 6, 9 and 12 months after the event). Sessions lasted between 30-60 mins | 52 | Intervention includes a goal setting element with target > 3,000 steps/d at baseline<br><br>69% completed the trial |
| Katzmarzyk 2011  | To assess whether a pedometer-based educational intervention could increase MVPA in short term and to assess whether                                                               | NA                                | Received the same educational materials, but were given the YAMAX Digi-Walker SW-200 pedometer to record steps              | Education group only received a brochure detailing the importance of physical activity for maintaining health and guidance on | Self-monitored daily with instructions to engage in usual activity then to increase. Facilitator not involved in | Participants recorded their daily steps in a log sheet                                                                                                                                       | 2  | NA<br><br>80% completion rate                                                                                       |

|            |                                                                                                                                                                                                                                           |                                                                                                                                                                                      |                                                                                                                                                                                                        |                                                                                                                                                                    |                                                                                                                           |                                                                          |    |                                                                                                 |
|------------|-------------------------------------------------------------------------------------------------------------------------------------------------------------------------------------------------------------------------------------------|--------------------------------------------------------------------------------------------------------------------------------------------------------------------------------------|--------------------------------------------------------------------------------------------------------------------------------------------------------------------------------------------------------|--------------------------------------------------------------------------------------------------------------------------------------------------------------------|---------------------------------------------------------------------------------------------------------------------------|--------------------------------------------------------------------------|----|-------------------------------------------------------------------------------------------------|
|            | change in steps/day is associated with change in MVPA                                                                                                                                                                                     |                                                                                                                                                                                      |                                                                                                                                                                                                        | how to increase physical activity                                                                                                                                  | delivery of intervention                                                                                                  |                                                                          |    |                                                                                                 |
| Kirk 2009  | To assess whether those randomised to PA consultation delivered by a person or in written form increase PA levels over 6 and 12 months                                                                                                    | Transtheoretical model of behaviour change                                                                                                                                           | Self-instructional workbook included a pedometer                                                                                                                                                       | Received a two-page information leaflet by Tayside Diabetes network.                                                                                               | FTF consultation, workbook, follow-up phone calls                                                                         | 30 min FTF consultation with trained researcher at baseline and 6 months | 52 | NA<br><br>87% completion rate                                                                   |
| Lewis 2020 | The TAME health (Testing Activity Monitors' Effect on health) pilot randomized controlled trial aimed to investigate a low intensity intervention to increase PA and decrease cardiovascular disease risk within the primary care setting | Behavioural change techniques including goal setting on behaviour and health outcome, providing instructions and information on consequences, as well as facilitating social support | Participants in the pedometer group were given a digital pedometer (Digi-walker CW-700/701, YAMAX, San Antonio, TX, USA) and a PA log to record their daily steps, activity time, and distance walked. | Participants in the EAM group were given an UP24 monitor by Jawbone (San Francisco, CA, USA) and downloaded the corresponding UP app on their personal smartphones | All participants received a brief 5 A's counselling consisting of components: assess, advise, agree, assist, and arrange. | FTF consultation with regular meeting over 12 weeks period               | 12 | Goal setting could be used but was not specifically part of intervention<br><br>100% completion |

|            |                                                                                                                                                  |    |                                                                                                                                                                                                                                                                                                                                                                                                                           |                                                                                                                                                                                                                                                                                                                       |                                                                                                                                                                                                                                                                                                                                                         |                                         |         |            |
|------------|--------------------------------------------------------------------------------------------------------------------------------------------------|----|---------------------------------------------------------------------------------------------------------------------------------------------------------------------------------------------------------------------------------------------------------------------------------------------------------------------------------------------------------------------------------------------------------------------------|-----------------------------------------------------------------------------------------------------------------------------------------------------------------------------------------------------------------------------------------------------------------------------------------------------------------------|---------------------------------------------------------------------------------------------------------------------------------------------------------------------------------------------------------------------------------------------------------------------------------------------------------------------------------------------------------|-----------------------------------------|---------|------------|
| Paula 2015 | To evaluate the effect of the DASH diet associated with increased walking on ABPM in patients with type 2 diabetes and uncontrolled hypertension | NA | Patients were asked to increase physical activity by walking at least 15 to 20 minutes per day, 5 days per week, in addition to their baseline activities. A pedometer was provided to be used during the 4-week intervention period. During the study, twice a week, text messages (SMS) were sent or phone calls were made to stimulate compliance with the general protocol. Patient counselling on diet was performed | Control Group. Patients received dietary recommendations according to American Diabetes Association guidelines 6 and were instructed to maintain their usual physical activity during the study. A pedometer was provided to be used every day exclusively in the first and last week of the study to record usual PA | At baseline, patients underwent 24-hour ABPM and their usual walking habits were assessed by daily step count using a pedometer during 1week.Clinical , nutritional, and physical activity were assessed and laboratory evaluations were performed. This run-in period involved two office visits. The duration of the trial was 4 weeks and at the end | FTF consultation with two office visits | 4 weeks | NA<br>100% |
|------------|--------------------------------------------------------------------------------------------------------------------------------------------------|----|---------------------------------------------------------------------------------------------------------------------------------------------------------------------------------------------------------------------------------------------------------------------------------------------------------------------------------------------------------------------------------------------------------------------------|-----------------------------------------------------------------------------------------------------------------------------------------------------------------------------------------------------------------------------------------------------------------------------------------------------------------------|---------------------------------------------------------------------------------------------------------------------------------------------------------------------------------------------------------------------------------------------------------------------------------------------------------------------------------------------------------|-----------------------------------------|---------|------------|

|              |                                                                                                                                                                                                                                          |                                                        |                                                                                                     |                                                                                                                                                               |                                                                                                                                                                                                     |                                                                                                    |    |                                                                                                                                    |
|--------------|------------------------------------------------------------------------------------------------------------------------------------------------------------------------------------------------------------------------------------------|--------------------------------------------------------|-----------------------------------------------------------------------------------------------------|---------------------------------------------------------------------------------------------------------------------------------------------------------------|-----------------------------------------------------------------------------------------------------------------------------------------------------------------------------------------------------|----------------------------------------------------------------------------------------------------|----|------------------------------------------------------------------------------------------------------------------------------------|
|              |                                                                                                                                                                                                                                          |                                                        | by the research dietitian (TPP) and on physical activity by the physical educator (AZN).            |                                                                                                                                                               | of the study, ABPM and anthropometric and laboratory measurements were performed. Patients were advised not to change any usual medication during the study.                                        |                                                                                                    |    |                                                                                                                                    |
| Pekmezi 2017 | To assess whether women assigned to the Home-based, individually tailored Physical activity Print (HIPP) intervention would more greatly increase PA and related psychosocial variables at 6 months when compared with the control group | Social cognitive theory and the transtheoretical model | Accusplit pedometers and activity logs provided to encourage self-monitoring of exercise behaviour. | Received mailings with cancer prevention information on topics other than PA. These were received at time points identical to those of the intervention group | For self-reported data participants wore accelerometers on their hip for 7 consecutive days at baseline and 6 months (contact with trial investigators). Accelerometers were mailed to participants | Accelerometer was always worn over the 7 days from baseline. Contact time at 6 months not reported | 26 | Goal setting used to measure self-regulation nature of intervention<br><br>61% returned at least three of the four updated surveys |

|             |                                                                                                                                                                                               |                                                                                           |                                                                                                                                                                                                                                                                                                                                                                                                                         |                                                                                                                                            |                     |                                                                                                                                                                                                    |           |                                                                                                                                                              |
|-------------|-----------------------------------------------------------------------------------------------------------------------------------------------------------------------------------------------|-------------------------------------------------------------------------------------------|-------------------------------------------------------------------------------------------------------------------------------------------------------------------------------------------------------------------------------------------------------------------------------------------------------------------------------------------------------------------------------------------------------------------------|--------------------------------------------------------------------------------------------------------------------------------------------|---------------------|----------------------------------------------------------------------------------------------------------------------------------------------------------------------------------------------------|-----------|--------------------------------------------------------------------------------------------------------------------------------------------------------------|
| Piette 2011 | Evaluate the impact of telephone-delivered cognitive behavioural therapy (CBT) targeting patients' management of depressive symptoms, physical activity levels, and diabetes-related outcomes | CBT focused on depressive symptoms and links between depression, PA and diabetes outcomes | <p>Intervention patients participated in a 12-month telephone-delivered CBT program.</p> <p>Six weeks after completing their baseline assessment, all patients were sent an Omron HJ-720 ITC pedometer with a built-in clock and electronic memory. Pedometers were sent blinded using a removable sticker, and patients were instructed to wear the pedometer throughout walking hours for seven consecutive days.</p> | Usual care patients received: a copy of the Feeling Good Handbook -a self-help book based on cognitive behavioural therapy for depression. | Telephone delivered | The CBT program included an initial intensive phase of 12-weekly sessions followed by nine monthly booster sessions. counsellors introduced concepts related to a pedometer-based walking program. | 12 months | <p>Patient manuals included logs that they could use to complete CBT homework exercises and to monitor their progress toward step-count goals</p> <p>86%</p> |
|-------------|-----------------------------------------------------------------------------------------------------------------------------------------------------------------------------------------------|-------------------------------------------------------------------------------------------|-------------------------------------------------------------------------------------------------------------------------------------------------------------------------------------------------------------------------------------------------------------------------------------------------------------------------------------------------------------------------------------------------------------------------|--------------------------------------------------------------------------------------------------------------------------------------------|---------------------|----------------------------------------------------------------------------------------------------------------------------------------------------------------------------------------------------|-----------|--------------------------------------------------------------------------------------------------------------------------------------------------------------|



|                 |                                                                                                                                                              |                                                                                                                                                                                                             |                                                                                                                                                                                                                                          |                                                                                                                                |                                                     |                                                                                                                                                                                                                                                                                                                                                 |           |                                             |
|-----------------|--------------------------------------------------------------------------------------------------------------------------------------------------------------|-------------------------------------------------------------------------------------------------------------------------------------------------------------------------------------------------------------|------------------------------------------------------------------------------------------------------------------------------------------------------------------------------------------------------------------------------------------|--------------------------------------------------------------------------------------------------------------------------------|-----------------------------------------------------|-------------------------------------------------------------------------------------------------------------------------------------------------------------------------------------------------------------------------------------------------------------------------------------------------------------------------------------------------|-----------|---------------------------------------------|
| Plotnikoff 2013 | Explore the effectiveness of two innovative/theoretically based behavioural-change strategies to increase PA and reduce haemoglobin A1c (A1c) in T2DM adults | the Theory of Planned Behaviour, the Health Belief Model, Protection Motivation Theory, Social Cognitive Theory, and the Transtheoretical Model to predict forward PA behaviour stage of change transitions | Group 2: Participants in this group received a pedometer, logbook, and calendar to chart their progress. (There was no specific intervention recommendation regarding steps per week.)<br><br>Group 3: Addition of telephone counselling | Group 1: received standard print PA educational materials provided by the Canadian Diabetes Association (i.e., control group). | Mixed FTF (Grp 2) and telephone counselling (Grp 3) | Grp 2: The materials were tailored to be season specific (i.e., winter, spring, summer and autumn versions) and were mailed every 3 months for 12 months. Study participants completed a stage measure at baseline, 3, 6 and 9 months<br><br>Grp 3: counselling was carried out by five individuals with relevant degree qualifications related | 18 months | NA<br><br>74% provided PA data at 18 months |
|-----------------|--------------------------------------------------------------------------------------------------------------------------------------------------------------|-------------------------------------------------------------------------------------------------------------------------------------------------------------------------------------------------------------|------------------------------------------------------------------------------------------------------------------------------------------------------------------------------------------------------------------------------------------|--------------------------------------------------------------------------------------------------------------------------------|-----------------------------------------------------|-------------------------------------------------------------------------------------------------------------------------------------------------------------------------------------------------------------------------------------------------------------------------------------------------------------------------------------------------|-----------|---------------------------------------------|

|             |                                                                                                                                                                                                                  |                                                                                                                                               |                                                                                                                                                                                                                                                                                                                       |                                                                                                 |                                                                                                                                           |                                                                                                                                                                                                                                                 |        |                               |
|-------------|------------------------------------------------------------------------------------------------------------------------------------------------------------------------------------------------------------------|-----------------------------------------------------------------------------------------------------------------------------------------------|-----------------------------------------------------------------------------------------------------------------------------------------------------------------------------------------------------------------------------------------------------------------------------------------------------------------------|-------------------------------------------------------------------------------------------------|-------------------------------------------------------------------------------------------------------------------------------------------|-------------------------------------------------------------------------------------------------------------------------------------------------------------------------------------------------------------------------------------------------|--------|-------------------------------|
|             |                                                                                                                                                                                                                  |                                                                                                                                               |                                                                                                                                                                                                                                                                                                                       |                                                                                                 |                                                                                                                                           | to PA promotion and/or counselling and who received a 1-day, 7-h training course                                                                                                                                                                |        |                               |
| Silfee 2016 | To determine the preliminary effect of a behavioural intervention on the use of self-regulation strategies and moderate-to-vigorous physical activity (MVPA) in overweight and obese adults with type 2 diabetes | behavioural intervention that included goal setting, time management, and enlisting social support to help participants plan their weekly PA. | Participants were given weekly PA logs and pedometers to self-monitor their PA for two weeks. The control group received information regarding their measured PA habits.<br><br>At session three, both groups received the BodyMedia armband to wear for seven days. The intervention group reviewed behavioral goals | The control group received written recommendations for PA for adults with T2DM, and a pedometer | FTF training 6 weeks prior to intervention was provided. Then during the intervention, they met individually with a researcher in person. | Both groups met individually with a researcher four times over five weeks.<br><br>The first and second visits were one week apart. Visit three was scheduled two weeks after visit two.<br><br>The third and fourth visits were one week apart. | 7 days | PA goals were set.<br><br>88% |

|                  |                                                                                                                                                                                                              |                                                                             |                                                                                                                                                                                                                                       |                                                                        |                                     |                                                                                                                                                              |    |                                                                    |
|------------------|--------------------------------------------------------------------------------------------------------------------------------------------------------------------------------------------------------------|-----------------------------------------------------------------------------|---------------------------------------------------------------------------------------------------------------------------------------------------------------------------------------------------------------------------------------|------------------------------------------------------------------------|-------------------------------------|--------------------------------------------------------------------------------------------------------------------------------------------------------------|----|--------------------------------------------------------------------|
|                  |                                                                                                                                                                                                              |                                                                             | <p>and identified barriers to PA.</p> <p>They set PA goals and self-monitored their PA.</p> <p>The final visit had both groups completing the post-test self-regulation measurement and receiving information regarding their PA.</p> |                                                                        |                                     | <p>During the first visit, both groups completed self-regulation measurements and received a BodyMedia armband to wear for seven days.</p>                   |    |                                                                    |
| Tudor-Locke 2004 | To assess if first step program is associated with improvements in physical activity (steps per day) and whether increased physical activity was related to improvements in cardiovascular health, glycaemic | Program based on theoretical principles of self-efficacy and social support | Pedometers provided and the program manual containing goal setting and problem-solving exercises, as well as calendars for self-monitoring steps/day                                                                                  | Received postcards thanking participants for taking part in the study. | Face-to-face assessments at meeting | Initial 4 weeks participants were asked to attend four weekly group meetings, remaining 12 weeks participants asked to use pedometers and calendars for goal | 16 | <p>Increase PA &gt; 3000 steps/day.</p> <p>78% completion rate</p> |

|               |                                                                                                                                                                          |                                                                                |                                                                                                                                                                                                              |                                                                  |                                                                                                |                                                                                                                                                                    |           |                                                                                                                                                        |
|---------------|--------------------------------------------------------------------------------------------------------------------------------------------------------------------------|--------------------------------------------------------------------------------|--------------------------------------------------------------------------------------------------------------------------------------------------------------------------------------------------------------|------------------------------------------------------------------|------------------------------------------------------------------------------------------------|--------------------------------------------------------------------------------------------------------------------------------------------------------------------|-----------|--------------------------------------------------------------------------------------------------------------------------------------------------------|
|               | control, and lipid profiles                                                                                                                                              |                                                                                |                                                                                                                                                                                                              |                                                                  |                                                                                                | setting and self-monitoring                                                                                                                                        |           |                                                                                                                                                        |
| Van Dyck 2013 | Examine the effects of physical activity program were mediated by theoretical constructs targeted by the intervention, both post-intervention and at 1 year              | Intervention based on self-determination theory and the transtheoretical model | Accelerometer, pedometer and IPAQ. Pedometer and accelerometer were worn at the waist during waking hours for 7 days. Activity log was used to record step taken and the type duration of walking activities | Unclear                                                          | Face-to-face session, pedometer use and seven phone calls (tailored motivational interviewing) | Telephone calls ranged from 15 to 20 min spread over a 24-week period                                                                                              | 24        | NA<br><br>96% completion rate                                                                                                                          |
| Yates 2009    | Investigate whether a pragmatic structured education program with and without pedometer use is effective for promoting physical activity and improving glucose tolerance | NA                                                                             | Group 1 received a 3-h group-based structured education program designed to promote walking activity using personalized steps per-day goals and pedometers.                                                  | Group 3 received a brief information leaflet (control condition) | FTF                                                                                            | A single-session group based education program. The program is 180 min long; 105 min are dedicated to addressing the causes, complications, timeline, and identity | 12 months | Sedentary participants were encouraged to increase their activity levels by at least 3,000 steps per day, equivalent to ~30 min of walking.<br><br>82% |

|            |                                                                                                                                                                                                |                                                                                                                                                                                                |                                                                                                                                                                                  |                                                                                                                                                                                                              |                                                                                                                                                                                      |                                                                                                                                                                                                 |    |                                                                           |
|------------|------------------------------------------------------------------------------------------------------------------------------------------------------------------------------------------------|------------------------------------------------------------------------------------------------------------------------------------------------------------------------------------------------|----------------------------------------------------------------------------------------------------------------------------------------------------------------------------------|--------------------------------------------------------------------------------------------------------------------------------------------------------------------------------------------------------------|--------------------------------------------------------------------------------------------------------------------------------------------------------------------------------------|-------------------------------------------------------------------------------------------------------------------------------------------------------------------------------------------------|----|---------------------------------------------------------------------------|
|            | in those with impaired glucose tolerance (IGT)                                                                                                                                                 |                                                                                                                                                                                                | Group 2 received a 3-h group-based structured education program designed to promote walking activity using generic time-based goals.                                             |                                                                                                                                                                                                              |                                                                                                                                                                                      | of IGT and 75 min are targeted to addressing the perceived effectiveness of exercise as a treatment for IGT, walking self-efficacy beliefs, barriers to walking, and self-regulatory strategies |    |                                                                           |
| Yates 2017 | To investigate whether an established behavioural intervention, Walking Away from Type 2 diabetes mellitus, is effective at promoting and sustaining increased walking activity when delivered | Protection motivation theory in which an association between perceived disease severity and the intention to be physically active in those with Type 2 diabetes mellitus has been demonstrated | Walking Away from Type 2 diabetes mellitus, a pragmatic 3-h group-based structured education programme incorporating pedometer use with annual follow-on refresher sessions were | Control participants received a standardized booklet detailing information on Type 2 diabetes mellitus risk informed by Leventhal's common-sense model and how physical activity and lifestyle change can be | The participants in the intervention group were provided with pedometer and step/day diary provided free. They were encouraged to increase their physical activity levels up to 3000 | 2 follow up session: 12 and 24 months                                                                                                                                                           | 52 | Increasing PA by 500 steps/day every fortnight<br><br>71% completion rate |

|                              |                                                                                                                                            |                                               |                                           |                                      |                                                                                                                                                                                                                                                      |                                                                                                                             |          |                                                                  |
|------------------------------|--------------------------------------------------------------------------------------------------------------------------------------------|-----------------------------------------------|-------------------------------------------|--------------------------------------|------------------------------------------------------------------------------------------------------------------------------------------------------------------------------------------------------------------------------------------------------|-----------------------------------------------------------------------------------------------------------------------------|----------|------------------------------------------------------------------|
|                              | within primary care.                                                                                                                       |                                               | offered to the participants               | used to prevent or delay the disease | step/day over baseline levels depending on individual preference and ability. Participants set an action plan detailing where, when and how their first proximal goal would be reached and were encouraged to repeat this process for each new goal. |                                                                                                                             |          |                                                                  |
| <b>Accelerometer/Fitbits</b> |                                                                                                                                            |                                               |                                           |                                      |                                                                                                                                                                                                                                                      |                                                                                                                             |          |                                                                  |
| Claes 2020                   | To assess the feasibility, acceptance, and short-term clinical effectiveness of the PATHway system for maintaining PA and physical fitness | PATHway system involved behaviour change goal | Patients were provided with accelerometer | Usual care                           | PATHway system installed in participants home                                                                                                                                                                                                        | Participants were instructed to wear the Actigraph GT9X Link on the nondominant wrist for 24 h per day during 7-consecutive | 6 months | 150 min of moderate intensity PA per week.<br><br>83% completion |

|               |                                                                                                                                                                        |    |                                                                                                                         |                                                                                  |                                                                                                                                                 |                                                                                                               |    |                                                                                                 |
|---------------|------------------------------------------------------------------------------------------------------------------------------------------------------------------------|----|-------------------------------------------------------------------------------------------------------------------------|----------------------------------------------------------------------------------|-------------------------------------------------------------------------------------------------------------------------------------------------|---------------------------------------------------------------------------------------------------------------|----|-------------------------------------------------------------------------------------------------|
|               | of patients with CVD after completion of an ambulatory centre-based CR program                                                                                         |    |                                                                                                                         |                                                                                  |                                                                                                                                                 | days.                                                                                                         |    |                                                                                                 |
| Frederix 2015 | To assess medium-term effectiveness of a patient-specific, comprehensive cardiac tele-rehabilitation program in addition to standard ambulatory cardiac rehabilitation | NA | Yorbody accelerometer motion sensor used, internet-based tele-rehabilitation in addition to Centre-based rehabilitation | Centre-based rehabilitation alone                                                | Psychologist aimed to improve patient self-efficiency to change prior lifestyle. SMS message sent out to provide motivational content           | At least 2 exercise training sessions per week. Patients instructed to exercise for 45 to 60 mins per session | 24 | Predefined exercise training goal disseminated via SMS<br><br>90% complete the study as planned |
| Guiraud 2012  | Assess the efficacy of a strategy, based on telephone support oriented by accelerometer measurements, on the adherence to PA recommendations in cardiac patients not   | NR | Accelerometer used to measure all PA outcomes                                                                           | PA measured with accelerometer during the 8 <sup>th</sup> week of testing period | PA measurements were recorded during a period of 2 months. Kinesiologist insisted on the importance of wearing the accelerometer . Each session | Patients participated in 45-minute fitness, gymnastics, relaxation, Qi Gong, or aquatic training sessions.    | 8  | Goal setting for 2 weeks for EE outcome<br><br>69% of participants complete the trial           |

|               |                                                                                                                                                                                                                             |    |                                                                                                                                                                                                                                                                         |                                                                                                                                                  |                                                                                      |                                                                                                                                            |          |              |
|---------------|-----------------------------------------------------------------------------------------------------------------------------------------------------------------------------------------------------------------------------|----|-------------------------------------------------------------------------------------------------------------------------------------------------------------------------------------------------------------------------------------------------------------------------|--------------------------------------------------------------------------------------------------------------------------------------------------|--------------------------------------------------------------------------------------|--------------------------------------------------------------------------------------------------------------------------------------------|----------|--------------|
|               | achieving PA recommendations                                                                                                                                                                                                |    |                                                                                                                                                                                                                                                                         |                                                                                                                                                  | was monitored by a physiotherapist or kinesiologist and supervised by a cardiologist |                                                                                                                                            |          |              |
| Karstoft 2013 | Evaluate the feasibility of free-living walking training in type 2 diabetic patients and to investigate the effects of interval-walking training versus continuous-walking training upon physical fitness, body composition | NA | Interventions<br>All subjects received a JDMate, which was worn as a pedometer throughout the study.<br><br>Subjects randomized to a training group used the JDMate's training function, which, based on triaxial accelerometry, estimates training energy expenditure. | Subjects in the CON group were instructed to continue their habitual lifestyle for 4 months and had their JDMate pedometer data uploaded monthly | FTF training sessions                                                                | Training groups were prescribed five sessions per week (60 min/session) and were controlled with an accelerometer and a heart-rate monitor | 4 months | NA<br><br>NR |



|              |                                                                                                                                                                                                                        |                                                                                        |                                                                                                                                                                                                                         |                                                                                                                                                                                                                    |                                                                                         |                                                        |          |                                                                                                                                    |
|--------------|------------------------------------------------------------------------------------------------------------------------------------------------------------------------------------------------------------------------|----------------------------------------------------------------------------------------|-------------------------------------------------------------------------------------------------------------------------------------------------------------------------------------------------------------------------|--------------------------------------------------------------------------------------------------------------------------------------------------------------------------------------------------------------------|-----------------------------------------------------------------------------------------|--------------------------------------------------------|----------|------------------------------------------------------------------------------------------------------------------------------------|
| Lyons 2017   | To determine the feasibility, acceptability, and effect on physical activity of an intervention combining a wearable physical activity monitor, tablet device, and telephone counselling among adults aged 55-79 years | App based on behaviour change techniques and adherence to theory-based recommendations | Intervention group were lent a mini tablet mobile device (Apple iPad Mini, Apple Inc, Cupertino, CA) and a wearable electronic activity monitor (Up24, Jawbone Inc, San Francisco, CA) for home use during the study.   | The wait-list control group did not receive any intervention until after their final assessment when they were provided the intervention in full                                                                   | Self-monitoring but also some counselling sessions                                      | Participants attended 4 scheduled visits of 15-20 mins | 12 weeks | Goals were negotiated between the counsellors and individuals, with counsellors suggesting at least 7000 steps per day<br><br>100% |
| Lystrup 2020 | Investigate the effects of adding virtual activity groups to a multicomponent ambulatory activity monitoring intervention in managing chronic conditions such as obesity and type 2 diabetes.                          | NA                                                                                     | The Fitbit + Friends group served as the intervention group. Subjects in the Fitbit + Friends group were assigned to a virtual fitness group with 9 other individuals from their randomized block. Every subject in the | SoloFitbit subjects with the same secure Fitbit® and WhatsApp® platforms but did not assign them to any virtual support groups. Their step counts were visible only to themselves and the research coordinator who | Subjects had in-person follow up sessions at 3 and 6 months with a research coordinator | Research coordinator provided individual feedback      | 6 months | Each participant either stated a specific step-count goal or were recommended to reach 10,000                                      |

|             |                                                                                             |                                                 |                                                                                                                                                                                                                                                                                                                                                                   |                                                           |                             |                                                                |        |                               |
|-------------|---------------------------------------------------------------------------------------------|-------------------------------------------------|-------------------------------------------------------------------------------------------------------------------------------------------------------------------------------------------------------------------------------------------------------------------------------------------------------------------------------------------------------------------|-----------------------------------------------------------|-----------------------------|----------------------------------------------------------------|--------|-------------------------------|
|             |                                                                                             |                                                 | Fitbit + Friends group was a virtual “friend” with the rest of the group and was able to see a “leader board” which tracked individual step counts and ranked them in order. Within their smartphone applications, Fitbit + Friends subjects were able to see in real time their daily step counts in comparison with the rest of their group on a ranking board. | gave identical scripted feedback to both groups.          |                             |                                                                |        |                               |
| Matrin 2015 | To investigate whether a fully automated mobile health (mHealth) intervention with tracking | Smart texts reflected behaviour change theories | Participants used their own smartphones.<br>Digital physical activity tracking was performed                                                                                                                                                                                                                                                                      | Control participants were blinded to the device interface | Automated smart text system | Smart texts provided smartphone-delivered coaching 3 times/day | 1 week | 10 000 steps/day goal<br>100% |

|               |                                                                                                                                                                                                                                            |    |                                                                                                                                                                    |                                                                                                                                                                        |                                                                                                                  |                                                                                                                          |    |                           |
|---------------|--------------------------------------------------------------------------------------------------------------------------------------------------------------------------------------------------------------------------------------------|----|--------------------------------------------------------------------------------------------------------------------------------------------------------------------|------------------------------------------------------------------------------------------------------------------------------------------------------------------------|------------------------------------------------------------------------------------------------------------------|--------------------------------------------------------------------------------------------------------------------------|----|---------------------------|
|               | and texting components would increase physical activity                                                                                                                                                                                    |    | using the Fitbug Orb (Chicago, IL) (Figure S1), a wearable, display-free, triaxial accelerometer that pairs with low-energy Bluetooth with compatible smartphones. |                                                                                                                                                                        |                                                                                                                  |                                                                                                                          |    |                           |
| Miyamoto 2017 | Whether the use of tri-axial accelerometer can reduce sedentary time and increase non locomotive physical activity (LPA) and to investigate the effect of this intervention on parameters of glucose and fat metabolism in type 2 diabetes | NA | All participants wore a tri-axial accelerometer during intervention period and were given verbal instruction regarding their objectives                            | No instruction given in control group regarding physical activity, they wore an accelerometer but display was turned off so they could not receive any visual feedback | Visual feedback given to intervention groups and encouragement was provided by physical therapist to increase PA | Face-to-face meeting at start of intervention and at 4- and 8- week follow-up examinations . Time at meetings unreported | 12 | NA<br>97% completion rate |
| Paschali 2005 | To assess whether giving activity feedback to obese,                                                                                                                                                                                       | NA | Home-based intervention where participants received a                                                                                                              | Counselling session has the same structure as intervention, but review of                                                                                              | Participant received a manual at start of intervention.                                                          | 8 counselling sessions, length not reported                                                                              | 12 | NA<br>NR                  |

|  |                                                                                                     |  |                                                                                                                                                                         |                                                                |                                                                                          |  |  |  |
|--|-----------------------------------------------------------------------------------------------------|--|-------------------------------------------------------------------------------------------------------------------------------------------------------------------------|----------------------------------------------------------------|------------------------------------------------------------------------------------------|--|--|--|
|  | sedentary adults with type 2 diabetes would improve their adherence to a home-based walking program |  | manual containing instructions on self-regulation of exercise intensity and on behavioural self-management. Focus on accelerometer data which was processed by computer | the past months exercise relied upon data in the subject diary | Individual counselling sessions with behaviour therapist structured sessions we provided |  |  |  |
|--|-----------------------------------------------------------------------------------------------------|--|-------------------------------------------------------------------------------------------------------------------------------------------------------------------------|----------------------------------------------------------------|------------------------------------------------------------------------------------------|--|--|--|

NA: non-applicable; NR: not reported

eTable 4: Risk of bias study-by-study summary and overall by each domain

| Study                       | Random sequence generation | Allocation concealment | Blinding of outcome assessment | Incomplete outcome data | Selective reporting |
|-----------------------------|----------------------------|------------------------|--------------------------------|-------------------------|---------------------|
| Alonso-Dominguez 2019       | LOW                        | LOW                    | LOW                            | LOW                     | LOW                 |
| Anderson 2015               | UNCLEAR                    | UNCLEAR                | HIGH                           | LOW                     | LOW                 |
| Andrews 2011                | LOW                        | LOW                    | HIGH                           | LOW                     | LOW                 |
| Araiza 2006                 | UNCLEAR                    | UNCLEAR                | UNCLEAR                        | UNCLEAR                 | UNCLEAR             |
| Bjorgaas 2008               | UNCLEAR                    | UNCLEAR                | LOW                            | HIGH                    | LOW                 |
| Chudowolska-Kielkowska 2020 | LOW                        | LOW                    | LOW                            | HIGH                    | LOW                 |
| Claes 2020                  | LOW                        | LOW                    | HIGH                           | LOW                     | LOW                 |
| Cupples 2013                | LOW                        | LOW                    | LOW                            | LOW                     | UNCLEAR             |
| Dasgupta 2017               | LOW                        | UNCLEAR                | LOW                            | LOW                     | LOW                 |
| De Greef 2010               | LOW                        | LOW                    | LOW                            | LOW                     | LOW                 |
| De Greef 2011 (1)           | UNCLEAR                    | UNCLEAR                | LOW                            | LOW                     | LOW                 |
| De Greef 2011 (2)           | LOW                        | LOW                    | LOW                            | LOW                     | LOW                 |
| Diedrich 2010               | UNCLEAR                    | UNCLEAR                | HIGH                           | HIGH                    | LOW                 |
| Engel 2006                  | UNCLEAR                    | UNCLEAR                | LOW                            | LOW                     | HIGH                |
| Feyehun 2018                | LOW                        | LOW                    | HIGH                           | HIGH                    | UNCLEAR             |
| Frederix 2015               | LOW                        | HIGH                   | LOW                            | LOW                     | LOW                 |
| Greaney 2017                | UNCLEAR                    | UNCLEAR                | UNCLEAR                        | HIGH                    | UNCLEAR             |
| Grey 2019                   | UNCLEAR                    | LOW                    | HIGH                           | LOW                     | LOW                 |
| Guiraud 2012                | UNCLEAR                    | UNCLEAR                | UNCLEAR                        | LOW                     | LOW                 |
| Houle 2011/12               | LOW                        | UNCLEAR                | LOW                            | LOW                     | LOW                 |
| Karstoft 2013               | UNCLEAR                    | UNCLEAR                | LOW                            | UNCLEAR                 | LOW                 |
| Katzmarzyk 2011             | LOW                        | LOW                    | UNCLEAR                        | LOW                     | LOW                 |
| Kirk 2009                   | LOW                        | LOW                    | LOW                            | LOW                     | LOW                 |
| Lewis 2020                  | UNCLEAR                    | UNCLEAR                | HIGH                           | LOW                     | UNCLEAR             |
| Lyons 2017                  | LOW                        | LOW                    | HIGH                           | LOW                     | HIGH                |
| Lystrup 2020                | UNCLEAR                    | LOW                    | HIGH                           | LOW                     | HIGH                |
| Martin 2015                 | LOW                        | UNCLEAR                | LOW                            | LOW                     | LOW                 |
| Miyamoto 2017               | LOW                        | UNCLEAR                | UNCLEAR                        | LOW                     | LOW                 |
| Paschali 2005               | LOW                        | UNCLEAR                | HIGH                           | UNCLEAR                 | LOW                 |
| Paula 2015                  | UNCLEAR                    | LOW                    | UNCLEAR                        | LOW                     | LOW                 |
| Pekmezi 2017                | LOW                        | UNCLEAR                | UNCLEAR                        | LOW                     | LOW                 |
| Piette 2011                 | LOW                        | LOW                    | HIGH                           | LOW                     | LOW                 |
| Plotnikoff 2013             | UNCLEAR                    | LOW                    | UNCLEAR                        | HIGH                    | LOW                 |
| Silfee 2016                 | UNCLEAR                    | LOW                    | HIGH                           | HIGH                    | UNCLEAR             |

|                  |         |         |         |      |     |
|------------------|---------|---------|---------|------|-----|
| Tudor-Locke 2004 | UNCLEAR | UNCLEAR | UNCLEAR | HIGH | LOW |
| Van Dyck 2013    | LOW     | LOW     | LOW     | LOW  | LOW |
| Yates 2009       | LOW     | LOW     | UNCLEAR | LOW  | LOW |
| Yates 2017       | LOW     | LOW     | LOW     | LOW  | LOW |

**Proportions by each judgement across all studies**

| Judgement | Random sequence generation | Allocation concealment | Blinding of outcome assessment | Incomplete outcome data | Selective reporting |
|-----------|----------------------------|------------------------|--------------------------------|-------------------------|---------------------|
| Low       | 22 (58%)                   | 20 (52%)               | 16 (42%)                       | 27 (71%)                | 29 (76%)            |
| High      | 0 (0%)                     | 1 (3%)                 | 12 (32%)                       | 8 (21%)                 | 3 (8%)              |
| Unclear   | 16 (42%)                   | 17 (45%)               | 10 (26%)                       | 3 (8%)                  | 6 (16%)             |
